1 **Novel *Wolbachia* strains in *Anopheles* malaria vectors from Sub-Saharan Africa**

2 Claire L Jeffries<sup>1</sup>, Gena G Lawrence<sup>2</sup>, George Golovko<sup>3</sup>, Mojca Kristan<sup>1</sup>, James Orsborne<sup>1</sup>, Kirstin  
3 Spence<sup>1</sup>, Eliot Hurn<sup>1</sup>, Janvier Bandibabone<sup>4</sup>, Michael L Tantely<sup>5</sup>, Fara N Raharimalala<sup>5</sup>, Kalil Keita<sup>6</sup>,  
4 Denka Camara<sup>6</sup>, Yaya Barry<sup>6</sup>, Francis Wat'senga<sup>7</sup>, Emile Z Manzambi<sup>7</sup>, Yaw A Afrane<sup>8</sup>, Abdul R  
5 Mohammed<sup>8</sup>, Tarekegn A. Abeku<sup>9</sup>, Shivanand Hegde<sup>10</sup>, Kamil Khanipov<sup>3</sup>, Maria Pimenova<sup>3</sup>, Yuriy  
6 Fofanov<sup>3</sup>, Sébastien Boyer<sup>5^</sup>, Seth R Irish<sup>2,11</sup>, Grant L Hughes<sup>12</sup> & Thomas Walker<sup>1\*</sup>  
7

8 \*corresponding author: [thomas.walker@lshtm.ac.uk](mailto:thomas.walker@lshtm.ac.uk)

9  
10 **Author affiliations**

11 1 Department of Disease Control, Faculty of Infectious and Tropical Diseases, London School of  
12 Hygiene and Tropical Medicine, London, WC1E 7HT, UK.

13  
14 2 Entomology Branch, Division of Parasitic Diseases and Malaria, Center for Global Health, Centers  
15 for Disease Control and Prevention, 1600 Clifton Road NE, Atlanta GA 30033

16 3 Department of Pharmacology and Toxicology. University of Texas Medical Branch, Galveston, TX,  
17 USA.

18  
19 4 Laboratoire d'entomologie médicale et parasitologie, Centre de Recherche en Sciences Naturelles  
20 (CRSN/LWIRO), Sud-Kivu, Democratic Republic of Congo.

21 5 Institut Pasteur de Madagascar, Unité d'Entomologie Médicale, Ambatofotsikely, 101-Antananarivo,  
22 Madagascar.

23  
24 6 Nationale de Lutte contre le Paludisme, Ministère de la Santé, B.P. 595, Conakry, Guinea.

25  
26 7 National Institute of Biomedical Research, PO Box 1192, Kinshasa, Democratic Republic of Congo.

27  
28 8 Department of Medical Microbiology, College of Health Sciences, University of Ghana, Korle Bu,  
29 Accra, Ghana

30  
31 9 Malaria Consortium, Development House, 56-64 Leonard Street, London, EC2A 4LT, UK.

32  
33 10 Department of Pathology, University of Texas Medical Branch, Galveston, TX, USA.

34  
35 11 The US President's Malaria Initiative and Entomology Branch, Centers for Disease Control and  
36 Prevention, 1600 Clifton Road, Atlanta, GA, 30329-4027, USA

37 12 Department of Pathology, Institute for Human Infections and Immunity, Center for Tropical  
38 Diseases, Center for Biodefense and Emerging Infectious Disease. University of Texas Medical  
39 Branch, Galveston, TX, USA.

40  
41 ^ current address: Medical Entomology Platform, Institut Pasteur of Cambodia, 5 Bd Monivong PO  
42 Box 983, Phnom Penh, Cambodia.

43  
44  
45  
46  
47  
48  
49  
50  
51  
52  
53  
54

55 **Abstract**

56 *Anopheles* (*An.*) mosquitoes contain bacteria that can influence *Plasmodium* parasites. *Wolbachia*, a  
57 common insect endosymbiont, has historically been considered absent from *Anopheles* but has  
58 recently been found in *An. gambiae* populations. Here, we assessed a range of *Anopheles* species  
59 from five malaria-endemic countries for *Wolbachia* and *Plasmodium* infection. Strikingly, we found  
60 *Wolbachia* infections in *An. coluzzii*, *An. gambiae* s.s, *An. arabiensis*, *An. moucheti* and *An.* species  
61 'A' increasing the number of *Anopheles* species known to be naturally infected by this endosymbiont.  
62 Molecular analysis suggests the presence of phylogenetically diverse novel strains, while qPCR and  
63 16S rRNA sequencing indicates that *Wolbachia* is the dominant member of the microbiota in *An.*  
64 *moucheti* and *An.* species 'A'. We found no evidence of *Wolbachia/Asaia* co-infections, and presence  
65 of these endosymbionts did not have significant effects on malaria prevalence. We discuss the  
66 importance of novel *Wolbachia* strains in *Anopheles* and potential implications for disease control.

67  
68  
69  
70  
71  
72  
73  
74  
75  
76  
77  
78  
79  
80  
81  
82  
83  
84  
85  
86  
87  
88  
89  
90  
91  
92  
93  
94

## 95 Introduction

96 Malaria is transmitted to humans through inoculation of *Plasmodium* (*P.*) sporozoites during the  
97 infectious bite of an infected female *Anopheles* (*An.*) mosquito. The genus *Anopheles* consists of 475  
98 formally recognised species with ~40 vector species/species complexes responsible for the  
99 transmission of malaria at a level of public health concern [1]. During the mosquito infection cycle,  
100 *Plasmodium* parasites encounter a variety of resident microbiota both in the mosquito midgut and  
101 other tissues. Numerous studies have shown that certain species of bacteria can inhibit *Plasmodium*  
102 development [2–4]. For example, *Enterobacter* bacteria that reside in the *Anopheles* midgut can  
103 inhibit the development of *Plasmodium* parasites prior to their invasion of the midgut epithelium [5,6].  
104 *Wolbachia* endosymbiotic bacteria are estimated to naturally infect ~40% of insect species [7]  
105 including mosquito vector species that are responsible for transmission of human diseases such as  
106 *Culex* (*Cx.*) *quinquefasciatus* [8–10] and *Aedes* (*Ae.*) *albopictus* [11,12]. Although *Wolbachia* strains  
107 have been shown to have variable effects on arboviral infections in their native mosquito hosts [13–  
108 15], transinfected *Wolbachia* strains have been considered for mosquito biocontrol strategies, due to  
109 a variety of synergistic phenotypic effects. Transinfected strains in *Ae. aegypti* and *Ae. albopictus*  
110 provide strong inhibitory effects on arboviruses, with maternal transmission and cytoplasmic  
111 incompatibility enabling introduced strains to spread through populations [16–22]. Open releases of  
112 *Wolbachia*-transinfected *Ae. aegypti* populations have demonstrated the ability of the wMel *Wolbachia*  
113 strain to invade wild populations [23] and provide strong inhibitory effects on viruses from field  
114 populations [24], with releases currently occurring in arbovirus endemic countries such as Indonesia,  
115 Vietnam, Brazil and Colombia (<https://www.worldmosquitoprogram.org>).

116  
117 The prevalence of *Wolbachia* in *Anopheles* species has not been extensively studied, with most  
118 studies focused in Asia using classical PCR-based screening, and up until 2014 there has been no  
119 evidence of resident strains in mosquitoes from this genus [25–29]. Furthermore, significant efforts to  
120 establish artificially-infected lines were, up until recently, also unsuccessful [30]. Somatic, transient  
121 infections of the *Wolbachia* strains wMelPop and wAlbB in *An. gambiae* were shown to significantly  
122 inhibit *P. falciparum* [31] but the interference phenotype is variable with other *Wolbachia* strain-  
123 parasite combinations [32–34]. A stable line was established in *An. stephensi*, a vector of malaria in  
124 southern Asia, using the wAlbB strain and this was also shown to confer resistance to *P. falciparum*  
125 infection [35]. One potential reason postulated for the absence of *Wolbachia* in *Anopheles* species  
126 was thought to be due to the presence of other endosymbiotic bacteria, particularly from the genus  
127 *Asaia* [36]. This acetic acid bacterium is stably associated with several *Anopheles* species and is  
128 often the dominant species in the mosquito microbiota [37]. In laboratory studies, *Asaia* has been  
129 shown to impede the vertical transmission of *Wolbachia* in *Anopheles* [36] and was shown to have a  
130 negative correlation with *Wolbachia* in mosquito reproductive tissues [38].

131  
132 Recently, resident *Wolbachia* strains have been discovered in the *An. gambiae* s.l. complex, which  
133 consists of multiple morphologically indistinguishable species including several major malaria vector  
134 species. *Wolbachia* strains (collectively named wAnga) were found in *An. gambiae* s.l. populations in

135 Burkina Faso [39] and Mali [40], suggesting that *Wolbachia* may be more abundant in the *An.*  
136 *gambiae* complex across Sub-Saharan Africa. Globally, there is a large variety of *Anopheles* vector  
137 species (~70) that have the capacity to transmit malaria [41] and could potentially contain resident  
138 *Wolbachia* strains. Additionally, this number of malaria vector species may be an underestimate given  
139 that recent studies using molecular barcoding have also revealed a larger diversity of *Anopheles*  
140 species than would have been identified using morphological identification alone [42,43].

141

142 In this study, we collected *Anopheles* mosquitoes from five malaria-endemic countries; Ghana,  
143 Democratic Republic of the Congo (DRC), Guinea, Uganda and Madagascar, from 2013-2017. Wild-  
144 caught adult female *Anopheles* were screened for *P. falciparum* malaria parasites, *Wolbachia* and  
145 *Asaia* bacteria. In total, we analysed mosquitoes from 17 *Anopheles* species that are known malaria  
146 vectors or implicated in transmission, and some unidentified species, discovering five species of  
147 *Anopheles* with resident *Wolbachia* strains; *An. coluzzii* from Ghana, *An. gambiae* s.s., *An.*  
148 *arabiensis*, *An. moucheti* and *Anopheles* species 'A' from DRC. Using *Wolbachia* gene sequencing  
149 we show that the resident strains in these malaria vectors are diverse, novel strains and qPCR and  
150 16S rRNA amplicon sequencing data suggests that the strains in *An. moucheti* and *An.* species 'A'  
151 are higher density infections, compared to the strains found in the *An. gambiae* s.l. complex. We  
152 found no evidence for either *Wolbachia-Asaia* co-infections, or for either endosymbiont having any  
153 significant effect on the prevalence of malaria in wild mosquito populations.

154

## 155 **Results**

156

157 **Mosquito species and resident *Wolbachia* strains.** *Anopheles* species composition varied  
158 depending on country and mosquito collection sites (**Table 1**). We detected *Wolbachia* in *An. coluzzii*  
159 (previously named M molecular form) mosquitoes from Ghana (prevalence of 4% - termed wAnga-  
160 Ghana) and *An. gambiae* s.s. (previously named S molecular form) from all six collection sites in DRC  
161 (prevalence range of 8-24%) in addition to a single infected *An. arabiensis* from Kalemie in DRC  
162 (**Figure 1, Table 1**). The molecular phylogeny of the ITS2 gene of *Anopheles gambiae* s.l. complex  
163 individuals (including both *Wolbachia*-infected and uninfected individuals analysed in our study)  
164 confirmed molecular species identifications made using species-specific PCR assays (**Figure 2**).  
165 Novel resident *Wolbachia* infections were detected in two additional *Anopheles* species from DRC;  
166 *An. moucheti* (termed wAnM) from Mikalayi, and *An.* species A (termed wAnsA) from Katana.  
167 Additionally, we screened adult female mosquitoes of *An.* species A (collected as larvae and adults)  
168 from Lwiro, a village near Katana in DRC, and detected *Wolbachia* in 30/33 (91%), indicating this  
169 resident wAnsA strain has a high infection prevalence in populations in this region. The molecular  
170 phylogeny of the ITS2 gene revealed *Wolbachia*-infected individuals from Lwiro and Katana are the  
171 same *An.* species A (**Figure 3**) previously collected in Eastern Zambia [43] and Western Kenya [44].  
172 All ITS2 sequences were deposited in GenBank (accession numbers MH598414 – MH598445)  
173 (**Supplementary Table 1**).

174 **Wolbachia strain typing.** Phylogenetic analysis of the 16S rRNA gene demonstrated that the 16S  
175 sequences for these strains cluster with other Supergroup B strains such as *wPip* (99-100%  
176 nucleotide identity) (**Figure 4a**). When compared to the resident *Wolbachia* strains in *An. gambiae*  
177 s.l. populations from Mali [40] and Burkina Faso [39], *wAnga-Ghana* is more closely related to the  
178 Supergroup B strain of *wAnga* from Burkina Faso. Although a resident strain was detected in *An.*  
179 *gambiae* s.s. and a single *An. arabiensis* from DRC through amplification of 16S rRNA fragments  
180 using two independent PCR assays [40,45], we were unable to obtain 16S sequences of sufficient  
181 quality to allow further analysis. The *Wolbachia* surface protein (*wsp*) gene has been evolving at a  
182 faster rate and provides more informative strain phylogenies [46]. As expected, however, and similar  
183 to *Wolbachia*-infected *An. gambiae* s.l. from Burkina Faso [39] and Mali [40], a fragment of the *wsp*  
184 gene was not amplified from *Wolbachia*-positive samples from *An. gambiae* s.s., *An. arabiensis* and  
185 *An. coluzzii*. Similarly, no *wsp* gene fragment amplification occurred from *wAnM*-infected *An.*  
186 *moucheti*. However, *wsp* sequences were obtained from both *Wolbachia*-infected individuals of *An.*  
187 species A from Katana. We also analysed the *wsp* sequences of 22 specimens of *An.* species A from  
188 Lwiro (near Katana) and found identical sequences to the two individuals from Katana. Phylogenetic  
189 analysis of the *wsp* sequences obtained for the *wAnsA* strain, for both individuals from Katana  
190 (*wAnsA wsp DRC-KAT1*, *wAnsA wsp DRC-KAT2*) and three representative individuals from Lwiro  
191 (*wAnsA wsp DRC-LWI1*, *wAnsA wsp DRC-LWI2*, *wAnsA wsp DRC-LWI3*) indicates *wAnsA* is most  
192 closely related to *Wolbachia* strains of Supergroup B (such as *wPip*, *wAlbB*, *wMa* and *wNo*) which is  
193 consistent with 16S rRNA phylogeny. However, the improved phylogenetic resolution provided by *wsp*  
194 indicates they cluster separately (**Figure 4b**). Typing of the *wAnsA wsp* nucleotide sequences  
195 highlighted that there were no exact matches to *wsp* alleles currently in the *Wolbachia* MLST  
196 database (<https://pubmlst.org/wolbachia/>) (**Table 2**). All *Wolbachia* 16S and *wsp* sequences were  
197 deposited into GenBank (accession numbers MH605275 – MH605285) (**Supplementary Table 2**).

198 Multilocus sequence typing (MLST) was undertaken to provide more accurate strain phylogenies. This  
199 was done for the novel *Wolbachia* strains *wAnM* and *wAnsA* in addition to the resident *wAnga-Ghana*  
200 strain in *An. coluzzii* from Ghana. We were unable to amplify any of the five MLST genes from  
201 *Wolbachia*-infected *An. gambiae* s.s. and *An. arabiensis* from DRC (likely due to low infection  
202 densities). New alleles for all five MLST gene loci (sequences differed from those currently present in  
203 the MLST database) confirm the diversity of these novel *Wolbachia* strains (**Table 2**). The phylogeny  
204 of these three novel strains based on concatenated sequences of all five MLST gene loci confirms  
205 they cluster within Supergroup B (**Figure 5a**). This also demonstrates the novelty as comparison with  
206 a wide range of strains (including all isolates highlighted through partial matching during typing of  
207 each locus) shows these strains are distinct from currently available sequences (**Figure 5a, Table 2**).  
208 The concatenated phylogeny indicates that *wAnM* is most closely related to a Hemiptera strain:  
209 Isolate number 1616 found in *Bemisia tabaci* in Uganda, and a Coleoptera strain: Isolate number 20  
210 found in *Tribolium confusum*. Concatenation of the MLST loci also indicates *wAnsA* is closest to a  
211 group containing various Lepidoptera and Hymenoptera strains from multiple countries in Asia,  
212 Europe and America, as well as two mosquito strains: Isolate numbers 1830 and 1831, found in

213 *Aedes cinereus* and *Coquillettidia richiardii* in Russia. This highlights the lack of concordance  
214 between *Wolbachia* strain phylogeny and their insect hosts across diverse geographical regions. We  
215 also found evidence of potential strain variants in *wAnsA* through variable MLST gene fragment  
216 amplification and resulting closest-match allele numbers. A second *wAnsA*-infected sample, *An. sp.*  
217 A/1 (W+) DRC-KAT2, only amplified *hcpA* and *coxA* gene fragments and although identical  
218 sequences were obtained for *wsp* (**Figure 4b**) and *hcpA*, genetic diversity was seen in the *coxA*  
219 sequences, with typing revealing a different, but still novel allele for the *coxA* sequence from this  
220 individual (*wAnsA*(2) *coxA* DRC-KAT2) (**Figure 5b**). MLST gene fragment amplification was also  
221 variable for *wAnga*-Ghana-infected *An. coluzzii*, requiring two individuals to generate the five MLST  
222 gene sequences, and for the *hcpA* locus, more degenerate primers (*hcpA\_F3/hcpA\_R3*) were  
223 required to generate sequence of sufficient quality for analysis. This is likely due to the low density of  
224 this strain potentially influencing the ability to successfully amplify all MLST genes, in addition to the  
225 possibility of genetic variation in primer binding regions. Despite the sequences generated for this  
226 strain producing exact matches with alleles in the database for each of the five gene loci, the resultant  
227 allelic profile, and therefore strain type, did not produce a match, showing this *wAnga*-Ghana strain is  
228 also a novel strain type. The closest matches to the *wAnga*-Ghana allelic profile were with strains  
229 from two Lepidopteran species: Isolate number 609 found in *Fabriciana adippe* from Russia, and  
230 Isolate number 658 found in *Pammene fasciana* from Greece, but each of these only produced a  
231 match for 3 out of the 5 loci. The concatenated phylogeny for this strain (**Figure 5a**) indicates that  
232 across the 5 MLST loci, *wAnga*-Ghana is actually most closely related to a Lepidopteran strain found  
233 in *Thersamonia thersamon* in Russia (Isolate number 132). The phylogeny of *Wolbachia* strains  
234 based on the *coxA* gene (**Figure 5b**) highlights the genetic diversity of both the *wAnsA* strain variants  
235 and also *wAnga*-Ghana compared to the *wAnga*-Mali strain [40]; *coxA* gene sequences are not  
236 available for *wAnga* strains from Burkina Faso [39]. All *Wolbachia* MLST sequences were deposited  
237 into GenBank (accession numbers MH605286 – MH605305) (**Supplementary Table 3**).

238  
239 **Resident strain densities and relative abundance.** The relative densities of *Wolbachia* strains were  
240 estimated using qPCR targeting the *ftsZ* [47] and 16S rRNA [40] genes. *ftsZ* and 16S rRNA qPCR  
241 analysis indicated the amount of *Wolbachia* detected in *wAnsA*-infected and *wAnM*-infected females  
242 was approximately 1000-fold higher (Ct values 20-22) than *Wolbachia*-infected *An. gambiae* s.s., *An.*  
243 *arabiensis* and *wAnga*-Ghana-infected *An. coluzzii* (Ct values 30-33). To account for variation in  
244 mosquito body size and DNA extraction efficiency, we compared the total amount of DNA for  
245 *Wolbachia*-infected mosquito extracts and conversely, we found less total DNA in the *wAnsA*-infected  
246 extract (1.36 ng/ $\mu$ L) and the *An. moucheti* (*wAnM*-infected) extract (5.85 ng/ $\mu$ L) compared to the  
247 mean of 6.64 +/- 2.33 ng/ $\mu$ L for *wAnga*-Ghana-infected *An. coluzzii*. To estimate the relative  
248 abundance of resident *Wolbachia* strains in comparison to other bacterial species, we sequenced the  
249 bacterial microbiome using 16S rRNA amplicon sequencing on *Wolbachia*-infected individuals. We  
250 found *wAnsA*, *wAnsA*(2) and *wAnM* *Wolbachia* strains were the dominant operational taxonomic units  
251 (OTUs) of these mosquito species (**Figure 6**). In contrast, the lower density infection *wAnga*-Ghana  
252 strain represented only ~10% of the OTUs within the microbiome.

253 ***P. falciparum*, *Wolbachia* and *Asaia* prevalence.** The prevalence of *P. falciparum* in female  
254 mosquitoes was extremely variable across countries and collection locations (**Figure 1, Table 1**) with  
255 very high prevalence recorded in *An. gambiae* s.s. from villages close to Boke (52%) and Faranah  
256 (44%) in Guinea. Despite the collection of other *Anopheles* species in Guinea, *An. gambiae* s.s. was  
257 the only species to have detectable malaria infections. In contrast, malaria was detected in multiple  
258 major vector species from DRC, including *An. gambiae* s.s., *An. arabiensis* and *An. funestus* s.s. A  
259 high prevalence of *P. falciparum* was also detected in *An. gambiae* s.s. from Uganda for both  
260 collection years; 19% for 2013 and 36% for 2014. In contrast, no *P. falciparum* infections were  
261 detected in any of the *An. coluzzii* or *An. melas* collected in Ghana. In Madagascar, *P. falciparum*  
262 was detected in only two species; *An. gambiae* s.s. and *An. rufipes*. We compared the overall *P.*  
263 *falciparum* infection rates in *An. gambiae* s.s. mosquitoes collected across all locations from DRC to  
264 determine if there was any correlation with the presence of the low density wAnga-DRC *Wolbachia*  
265 resident strain. Overall, of the 128 mosquitoes collected, only 1.56% (n=2) had detectable *Wolbachia*-  
266 *Plasmodium* co-infections compared to 10.16% (n=13) where we only detected *Wolbachia*. A further  
267 11.72% (n=15) were only PCR-positive for *P. falciparum*. As expected, for the vast majority of  
268 mosquitoes (76.56%, n=98) we found no evidence of *Wolbachia* or *P. falciparum* present, resulting in  
269 no correlation across all samples (Fisher's exact *post hoc* test on unnormalized data, two-tailed,  
270  $P=0.999$ ). Interestingly, one *An.* species 'A' female from Katana was infected with *P. falciparum*.  
271  
272 For all *Wolbachia*-infected females collected in our study (including *An. coluzzii* from Ghana and novel  
273 resident strains in *An. moucheti* and *An. species A*), we did not detect the presence of *Asaia*. No  
274 resident *Wolbachia* strain infections were detected in *Anopheles* mosquitoes from Guinea, Uganda or  
275 Madagascar. However, high *Asaia* and malaria prevalence rates were present in *Anopheles*  
276 mosquitoes from Uganda and Guinea (including multiple species in all four sites in Guinea). We  
277 compared the overall *P. falciparum* infection rates in *An. gambiae* s.s. collected across all locations  
278 from Guinea, with and without *Asaia* bacteria, and found no overall correlation (Fisher's exact *post*  
279 *hoc* test on unnormalized data, two-tailed,  $P=0.4902$ ). There was also no overall correlation between  
280 *Asaia* and *P. falciparum* infections in *An. gambiae* s.s. from Uganda for both 2013 (Fisher's exact *post*  
281 *hoc* test on unnormalized data, two-tailed,  $P=0.601$ ) and 2014 (Fisher's exact *post hoc* test on  
282 unnormalized data, two-tailed,  $P=0.282$ ).  
283  
284 *Asaia* can be environmentally acquired at all life stages but can also have the potential to be vertically  
285 and horizontally transmitted between individual mosquitoes. Therefore, we performed 16S  
286 microbiome analysis on a sub-sample of *Asaia*-infected *An. gambiae* s.s. from Kissidougou (Guinea),  
287 a location in which high levels of *Asaia* were detected by qPCR (mean *Asaia* Ct = 17.84 +/- 2.27).  
288 *Asaia* in these individuals is the dominant bacterial species present (**Figure 7a**) but in Uganda we  
289 detected much lower levels of *Asaia* (qPCR mean Ct = 33.33 +/- 0.19) and this was reflected in *Asaia*  
290 not being a dominant species (**Figure 7b**). The alpha and beta diversity of *An. gambiae* s.s. from  
291 Kissidougou, Guinea and Butemba, Uganda shows much more overall diversity in the microbiome for  
292 Uganda individuals (**supplementary figure S1**). Interestingly, 2/5 of these individuals from

293 Kissidougou (Guinea) were *P. falciparum*-infected compared to 3/5 individuals from Uganda. To  
294 determine if the presence of *Asaia* had a quantifiable effect on the level of *P. falciparum* detected, we  
295 normalized *P. falciparum* Ct values from qPCR (**supplementary figure S2a**) and compared gene  
296 ratios for *An. gambiae* s.s. mosquitoes from Guinea, with or without *Asaia* (**supplementary figure**  
297 **S2b**). Statistical analysis using student's t-tests revealed no significant difference between  
298 normalized *P. falciparum* gene ratios ( $p= 0.51$ ,  $df =59$ ). Larger variation of Ct values was seen for  
299 *Asaia* (**supplementary figure S2c**) suggesting the bacterial densities in individual mosquitoes were  
300 more variable than *P. falciparum* parasite infection levels.

301

## 302 Discussion

303 Malaria transmission in Sub-Saharan Africa is highly dependent on the local *Anopheles* vector  
304 species but the primary vector complexes recognised are *An. gambiae* s.l., *An. funestus* s.l. *An. nili*  
305 s.l. and *An. moucheti* s.l. [41,48]. *An. gambiae* s.s. and *An. coluzzii* sibling species are considered  
306 the most important malaria vectors in Sub-Saharan Africa and recent studies indicate that *An. coluzzii*  
307 extends further north, and closer to the coast than *An. gambiae* s.s. within west Africa [49]. In our  
308 study, high malaria prevalence rates in *An. gambiae* s.s. across Guinea would be consistent with high  
309 malaria parasite prevalence (measured by rapid diagnostic tests) in Guéckédou prefecture, and the  
310 overall national malaria prevalence estimated to be 44% in 2013 [50]. However, malaria prevalence  
311 has decreased in the past few years with an overall prevalence across Guinea estimated at 15% for  
312 2016. Although our *P. falciparum* infection prevalence rates were also high in DRC, recent studies  
313 have shown comparable levels of infection with 35% of *An. gambiae* s.l. mosquitoes infected from  
314 Kinshasa [51]. We detected *P. falciparum* in *An. gambiae* s.s., *An. arabiensis*, *An. funestus* s.s. and  
315 *An. species A* from DRC. Morphological differences have been widely used for identification of  
316 malaria vectors but species complexes (such as *An. gambiae* s.l. and *An. funestus* s.l.) require  
317 species-diagnostic PCR assays. Historically, malaria entomology studies in Africa have focused  
318 predominantly on species from these complexes, likely due to the fact that mosquitoes from these  
319 complexes dominate the collections [43]. In our study, we used ITS2 sequencing to confirm  
320 secondary vector species that were *P. falciparum*-infected given the difficulties of morphological  
321 identification and recent studies demonstrating the inaccuracy of diagnostic species PCR-based  
322 molecular identification [52]. Our study is the first to report the detection of *P. falciparum* in *An.*  
323 *rufipes* from Madagascar; previously this species was considered a vector of *Plasmodium* species of  
324 non-human origin and has only very recently been implicated in human malaria transmission [53].  
325 However, detection of *P. falciparum* parasites in whole body mosquitoes does not confirm that the  
326 species plays a significant role in transmission. Detection could represent infected bloodmeal stages  
327 or oocysts present in the midgut wall so further studies are warranted to determine this species ability  
328 to transmit human malaria parasites.

329

330 The mosquito microbiota can modulate the mosquito immune response and bacteria present in wild  
331 *Anopheles* populations can influence malaria vector competence [4,5]. Endosymbiotic *Wolbachia*  
332 bacteria are particularly widespread through insect populations but they were commonly thought to be



333 absent from *Anopheles* mosquitoes. However, the recent discovery of *Wolbachia* strains in the *An.*  
334 *gambiae* s.l. complex in Burkina Faso and Mali [39,40] in addition to our study showing infection in  
335 *Anopheles* from Ghana and DRC, suggest resident strains could be widespread across Sub-Saharan  
336 Africa. The discovery of resident strains in Burkina Faso resulted from sequencing of the 16S rRNA  
337 gene identifying *Wolbachia* sequences rather than screening using *Wolbachia*-specific genes [39].  
338 Intriguingly, *Wolbachia* infections in these mosquitoes could not be detected using conventional PCR  
339 targeting the *wsp* gene. As the *wsp* gene has often been used in previous studies to detect strains in  
340 *Anopheles* species [25,27], this could explain why resident strains in the *An. gambiae* s.l. complex  
341 have gone undetected until very recently. Recent similar methods using 16S rRNA amplicon  
342 sequencing to determine the overall microbiota in wild mosquito populations has provided evidence  
343 for *Wolbachia* infections in *An. gambiae* in additional villages in Burkina Faso [54] and *Anopheles*  
344 species collected in Illinois, USA [55]. Our study describing resident *Wolbachia* strains in numerous  
345 species of *Anopheles* malaria vectors also highlights the potential for *Wolbachia* to be influencing  
346 malaria transmission, as postulated by previous studies [39,40,56]. Although no significant correlation  
347 was present for malaria and *Wolbachia* prevalence in the 128 *An. gambiae* s.s. individuals from DRC,  
348 we only detected co-infections in two individuals compared to 13 and 15 individuals infected only with  
349 *Wolbachia* or *P. falciparum* respectively. As the majority (77%) of samples had neither detectable  
350 *Wolbachia* resident strains or *P. falciparum*, a larger sample size would be needed to determine if  
351 there is a correlation, as shown previously in both Burkina Faso [56] and Mali [40]. The infection  
352 prevalence of resident *Wolbachia* strains in *An. coluzzii* from Ghana (4%) and *An. gambiae* s.s. from  
353 the DRC was variable but low (8-24%), consistent with infection prevalence in Burkina Faso (11%)  
354 [39] but much lower than those reported in Mali (60-80%) [40] where infection was associated with  
355 reduced prevalence and intensity of sporozoite infection in field-collected females.

356  
357 The discovery of a resident *Wolbachia* strain in *An. moucheti*, a highly anthropophilic and efficient  
358 malaria vector found in the forested areas of western and central Africa [41], suggests further studies  
359 are warranted that utilize large sample sizes to examine the influence of the *wAnM* *Wolbachia* strain  
360 on *Plasmodium* infection dynamics in this malaria vector. *An. moucheti* is often the most abundant  
361 vector, breeding in slow moving streams and rivers, contributing to year round malaria transmission in  
362 these regions [57,58]. This species has also been implicated as a main bridge vector species in the  
363 transmission of ape *Plasmodium* malaria in Gabon [59]. There is thought to be high genetic diversity  
364 in *An. moucheti* populations [60,61] which may either influence the prevalence of *Wolbachia* resident  
365 strains or *Wolbachia* could be contributing to genetic diversity through its effect on host reproduction.  
366 A novel *Wolbachia* strain in *An.* species 'A', present at high infection frequencies in Lwiro (close to  
367 Katana in DRC), also suggests more *Anopheles* species, including unidentified and potentially new  
368 species, could be infected with this widespread endosymbiotic bacterium. *An.* species A should be  
369 further investigated to determine if this species is a potential malaria vector given our study  
370 demonstrated *P. falciparum* infection in one of two individuals screened and ELISA-positive samples  
371 of this species were reported from the Western Highlands of Kenya [62].

372

373 The variability of *Wolbachia* prevalence rates in *An. gambiae* s.l. complex from locations within DRC  
374 and Ghana and previous studies in Burkina Faso [39] and Mali [40] suggest the environment is one  
375 factor that influences the presence or absence of resident strains. In our study we found no evidence  
376 of *Wolbachia-Asaia* co-infections across all countries, supporting laboratory studies that have shown  
377 these two bacterial endosymbionts demonstrate competitive exclusion in *Anopheles* species [36,38].  
378 We also found that *Asaia* infection densities (whole body mosquitoes) were variable and location  
379 dependent which would correlate with this bacterium being environmentally acquired at all life stages,  
380 but also having the potential for both vertical and horizontal transmission [37]. Significant variations in  
381 overall *Asaia* prevalence and density across different *Anopheles* species and locations in our study  
382 would also correlate with our data indicating no evidence of an association with *P. falciparum*  
383 prevalence in both Guinea and Uganda populations. Further studies are needed to determine the  
384 complex interaction between these two bacterial endosymbionts and malaria in diverse *Anopheles*  
385 malaria vector species. Horizontal transfer of *Wolbachia* strains between species (even over large  
386 phylogenetic differences) has shaped the evolutionary history of this endosymbiont in insects and  
387 there is evidence for loss of infection in host lineages over evolutionary time [63]. Our results showing  
388 a new strain present in *An. coluzzii* from Ghana (phylogenetically different to strains present in *An.*  
389 *gambiae* s.l. mosquitoes from both Burkina Faso and Mali), strain variants observed in *An.* species A,  
390 and the concatenated grouping of the novel *Anopheles* strains with strains found in different Orders of  
391 insects, support the lack of congruence between insect host and *Wolbachia* phylogenetic trees [64].  
392  
393 Our qPCR and 16S microbiome analysis indicates the densities of wAnM and wAnsA strains are  
394 significantly higher than resident *Wolbachia* strains in *An. gambiae* s.l. However, caution must be  
395 taken as we were only able to analyse selected individuals and larger collections of wild populations  
396 would be required to confirm these results. Native *Wolbachia* strains dominating the microbiome of  
397 *An. species A* and *An. moucheti* is consistent with other studies of resident strains in mosquitoes  
398 showing *Wolbachia* 16S rRNA gene amplicons vastly outnumber sequences from other bacteria in  
399 *Ae. albopictus* and *Cx. quinquefasciatus* [65,66]. The discovery of novel *Wolbachia* strains provides  
400 the rationale to undertake vector competence experiments to determine what effect these strains are  
401 having on malaria transmission. The tissue tropism of novel *Wolbachia* strains in malaria vectors will  
402 be particularly important to characterise given this will determine if these endosymbiotic bacteria are  
403 proximal to malaria parasites within the mosquito. It would also be important to determine the  
404 additional phenotypic effects novel resident *Wolbachia* strains have on their mosquito hosts. Some  
405 *Wolbachia* strains induce a reproductive phenotype termed cytoplasmic incompatibility (CI) that  
406 results in inviable offspring when an uninfected female mates with a *Wolbachia*-infected male. In  
407 contrast, *Wolbachia*-infected females produce viable progeny when they mate with both infected and  
408 uninfected male mosquitoes. This reproductive advantage over uninfected females allows *Wolbachia*  
409 to spread within mosquito populations.  
410  
411 *Wolbachia* has been the focus of recent biocontrol strategies in which *Wolbachia* strains transferred  
412 into naïve mosquito species provide strong inhibitory effects on arboviruses [19,20,67–70] and  
413 malaria parasites [31,35]. The discovery of two novel *Wolbachia* strains in *Anopheles* mosquitoes,

414 potentially present at much higher density than resident strains in the *An. gambiae* s.l. complex, also  
415 suggests the potential for these strains to be transinfected into other *Anopheles* species to produce  
416 inhibitory effects on *Plasmodium* parasites. *Wolbachia* transinfection success is partly attributed to  
417 the relatedness of donor and recipient host so the transfer of high density *Wolbachia* strains between  
418 *Anopheles* species may result in stable infections (or co-infections) that have strong inhibitory effects  
419 on *Plasmodium* development. Finally, if the resident strain present in *An. moucheti* is at low infection  
420 frequencies in wild populations, an alternative strategy known as the incompatible insect technique  
421 (IIT) could be implemented where *Wolbachia*-infected males are released to suppress the wild  
422 populations through CI (reviewed by [22]). In summary, the important discovery of diverse novel  
423 *Wolbachia* strains in *Anopheles* species will help our understanding of how *Wolbachia* strains can  
424 potentially impact malaria transmission, through natural associations or being used as candidate  
425 strains for transinfection to create stable infections in other species.

426

## 427 **Materials and Methods.**

428

429 **Study sites & collection methods.** *Anopheles* adult mosquitoes were collected from five malaria  
430 endemic countries in Sub-Saharan Africa; Guinea, Democratic Republic of the Congo (DRC), Ghana,  
431 Uganda and Madagascar between 2013 and 2017 (**Figure 1**). Human landing catches, CDC light  
432 traps and pyrethrum spray catches were undertaken between April 2014 – February 2015 in 10  
433 villages near four cities in Guinea; Foulayah (10.144633, -10.749717) and Balayani (10.1325, -  
434 10.7443) near Faranah; Djoumaya (10.836317, -14.2481) and Kaboye Amaraya (10.93435, -  
435 14.36995) near Boke; Tongbekoro (9.294295, -10.147953), Keredou (9.208919, -10.069525), and  
436 Gbangbadou (9.274363, -9.998639) near Kissidougou; and Makonon (10.291124, -9.363358),  
437 Balandou (10.407669, -9.219096), and Dalabani (10.463692, -9.451904) near Kankan. Human  
438 landing catches and pyrethrum spray catches were undertaken between January – September 2015  
439 in seven sites of the DRC; Kinshasa (-4.415881, 15.412188), Mikalayi (-6.024184, 22.318251),  
440 Kisangani (0.516350, 25.221176), Katana (-2.225129, 28.831604), Kalemie (-5.919054, 29.186572),  
441 and Kapolowe (-10.939802, 26.952970). We also analysed a subset from collections obtained from  
442 Lwiro (-2.244097, 28.815232), a village near Katana, collected between in September – October  
443 2015. A combination of CDC light traps, pyrethrum spray catches and human landing catches were  
444 undertaken in Butemba, Kyankwanzi District in mid-western Uganda (1.1068444, 31.5910085) in  
445 August and September 2013 and June 2014. CDC light trap catches were undertaken in May 2017 in  
446 Dogo in Ada, Greater Accra, Ghana (5.874861111, 0.560611111). In Madagascar, sampling was  
447 undertaken in June 2016 at four sites: Anivorano Nord, located in the Northern domain, (-  
448 12.7645000, 49.2386944), Ambomiharina, Western domain, (-16.3672778, 46.9928889), Antafia,  
449 Western domain, (-17.0271667, 46.7671389) and Ambohimarina, Central domain, (-  
450 18.3329444, 47.1092500). Trapping consisted of CDC light traps and a net trap baited with Zebu  
451 (local species of cattle) to attract zoophilic species [71].

452

453

454 **DNA extraction and species identification.** DNA was extracted from individual whole mosquitoes or  
455 abdomens using QIAGEN DNeasy Blood and Tissue Kits according to manufacturer's instructions.  
456 DNA extracts were eluted in a final volume of 100  $\mu$ L and stored at  $-20^{\circ}$ C. Species identification was  
457 initially undertaken using morphological keys followed by diagnostic species-specific PCR assays to  
458 distinguish between the morphologically indistinguishable sibling mosquito species of the *An.*  
459 *gambiae* [72–74] and *An. funestus* complexes [75]. To determine species identification for samples of  
460 interest and samples that could not be identified by species-specific PCR, Sanger sequences were  
461 generated from ITS2 PCR products [76].

462  
463 **Detection of *P. falciparum* and *Asaia*.** Detection of *P. falciparum* malaria was undertaken using  
464 qPCR targeting an 120-bp sequence of the *P. falciparum* cytochrome c oxidase subunit 1 (Cox1)  
465 mitochondrial gene [77] as preliminary trials revealed this was the optimal method for both sensitivity  
466 and specificity. Positive controls from gDNA extracted from a cultured *P. falciparum*-infected blood  
467 sample (parasitaemia of  $\sim 10\%$ ) were serially diluted to determine the threshold limit of detection, in  
468 addition to the inclusion no template controls (NTCs). *Asaia* detection was undertaken targeting the  
469 16S rRNA gene [78,79]. Ct values for both *P. falciparum* and *Asaia* assays in selected *An. gambiae*  
470 extracts were normalized to Ct values for a single copy *An. gambiae* rps17 housekeeping gene  
471 (accession no. AGAP004887 on [www.vectorbase.org](http://www.vectorbase.org)) [80,81]. As Ct values are inversely related to  
472 the amount of amplified DNA, a higher target gene Ct: host gene Ct ratio represented a lower  
473 estimated infection level. qPCR reactions were prepared using 5  $\mu$ L of FastStart SYBR Green Master  
474 mix (Roche Diagnostics), a final concentration of 1 $\mu$ M of each primer, 1  $\mu$ L of PCR grade water and 2  
475  $\mu$ L template DNA, to a final reaction volume of 10  $\mu$ L. Prepared reactions were run on a Roche  
476 LightCycler® 96 System and amplification was followed by a dissociation curve ( $95^{\circ}$ C for 10 seconds,  
477  $65^{\circ}$ C for 60 seconds and  $97^{\circ}$ C for 1 second) to ensure the correct target sequence was being  
478 amplified. PCR results were analysed using the LightCycler® 96 software (Roche Diagnostics). A  
479 sub-selection of PCR products from each assay was sequenced to confirm correct amplification of the  
480 target gene fragment.

481  
482 ***Wolbachia* detection.** *Wolbachia* detection was first undertaken targeting three conserved *Wolbachia*  
483 genes previously shown to amplify a wide diversity of strains; 16S rDNA gene [40,45], *Wolbachia*  
484 surface protein (wsp) gene [46] and FtsZ cell cycle gene [82]. DNA extracted from a *Drosophila*  
485 *melanogaster* fly (infected with the wMel strain of *Wolbachia*) was used a positive control, in addition  
486 to no template controls (NTCs). 16S rDNA [45] and wsp [46] gene PCR reactions were carried out in  
487 a Bio-Rad T100 Thermal Cycler using standard cycling conditions and PCR products were separated  
488 and visualised using 2% E-Gel EX agarose gels (Invitrogen) with SYBR safe and an Invitrogen E-Gel  
489 iBase Real-Time Transilluminator. FtsZ [47] and 16S rDNA [40] gene real time PCR reactions were  
490 prepared using 5  $\mu$ L of FastStart SYBR Green Master mix (Roche Diagnostics), a final concentration  
491 of 1 $\mu$ M of each primer, 1  $\mu$ L of PCR grade water and 2  $\mu$ L template DNA, to a final reaction volume of  
492 10  $\mu$ L. Prepared reactions were run on a Roche LightCycler® 96 System for 15 minutes at  $95^{\circ}$ C,  
493 followed by 40 cycles of  $95^{\circ}$ C for 15 seconds and  $58^{\circ}$ C for 30 seconds. Amplification was followed by

494 a dissociation curve (95°C for 10 seconds, 65°C for 60 seconds and 97°C for 1 second) to ensure the  
495 correct target sequence was being amplified. PCR results were analysed using the LightCycler® 96  
496 software (Roche Diagnostics). To estimate *Wolbachia* densities across multiple *Anopheles* mosquito  
497 species, *ftsZ* and 16S qPCR Ct values were compared to total dsDNA extracted measured using an  
498 Invitrogen Qubit 4 fluorometer. A serial dilution series of a known *Wolbachia*-infected mosquito DNA  
499 extract was used to correlate Ct values and amount of amplified target product.

500 ***Wolbachia* MLST.** Multilocus sequence typing (MLST) was undertaken to characterize *Wolbachia*  
501 strains using the sequences of five conserved genes as molecular markers to genotype each strain.  
502 In brief, 450-500 base pair fragments of the *gatB*, *coxA*, *hcpA*, *ftsZ* and *fbpA* *Wolbachia* genes were  
503 amplified from individual *Wolbachia*-infected mosquitoes using previously optimised protocols [83]. A  
504 *Cx. pipiens* gDNA extraction (previously shown to be infected with the *wPip* strain of *Wolbachia*) was  
505 used a positive control for each PCR run, in addition to no template controls (NTCs). If no  
506 amplification was detected using standard primers, further PCR analysis was undertaken using  
507 degenerate primers [83]. PCR products were separated and visualised using 2% E-Gel EX agarose  
508 gels (Invitrogen) with SYBR safe and an Invitrogen E-Gel iBase Real-Time Transilluminator. PCR  
509 products were submitted to Source BioScience (Source BioScience Plc, Nottingham, UK) for PCR  
510 reaction clean-up, followed by Sanger sequencing to generate both forward and reverse reads.  
511 Sequencing analysis was carried out in MEGA7 [84] as follows. Both chromatograms (forward and  
512 reverse traces) from each sample was manually checked, edited, and trimmed as required, followed  
513 by alignment by ClustalW and checking to produce consensus sequences. Consensus sequences  
514 were used to perform nucleotide BLAST (NCBI) database queries, and searches against the  
515 *Wolbachia* MLST database (<http://pubmlst.org/wolbachia>) [85]. If a sequence produced an exact  
516 match in the MLST database we assigned the appropriate allele number, otherwise the closest  
517 matches and number of differences were noted. The Sanger sequencing traces from the *wsp* gene  
518 were also treated in the same way and analysed alongside the MLST gene locus scheme, as an  
519 additional marker for strain typing

520 **Phylogenetic analysis.** Alignments were constructed in MEGA7 by ClustalW to include all relevant  
521 and available sequences highlighted through searches on the BLAST and *Wolbachia* MLST  
522 databases. Maximum Likelihood phylogenetic trees were constructed from Sanger sequences as  
523 follows. The evolutionary history was inferred by using the Maximum Likelihood method based on the  
524 Tamura-Nei model [86]. The tree with the highest log likelihood in each case is shown. The  
525 percentage of trees in which the associated taxa clustered together is shown next to the branches.  
526 Initial tree(s) for the heuristic search were obtained automatically by applying Neighbor-Join and  
527 BioNJ algorithms to a matrix of pairwise distances estimated using the Maximum Composite  
528 Likelihood (MCL) approach, and then selecting the topology with superior log likelihood value. The  
529 trees are drawn to scale, with branch lengths measured in the number of substitutions per site. Codon  
530 positions included were 1st+2nd+3rd+Noncoding. All positions containing gaps and missing data  
531 were eliminated. The phylogeny test was by Bootstrap method with 1000 replications. Evolutionary  
532 analyses were conducted in MEGA7 [84].

533 **Microbiome Analysis.** The microbiomes of selected individual *Anopheles* were analysed using  
534 barcoded high-throughput amplicon sequencing of the bacterial 16S rRNA gene. Sequencing  
535 libraries for each isolate were generated using universal 16S rRNA V3-V4 region primers [87] in  
536 accordance with Illumina 16S rRNA metagenomic sequencing library protocols. The samples were  
537 barcoded for multiplexing using Nextera XT Index Kit v2. Sequencing was performed on an Illumina  
538 MiSeq instrument using a MiSeq Reagent Kit v2 (500-cycles). Quality control and taxonomical  
539 assignment of the resultant reads were performed using CLC Genomics Workbench 8.0.1 Microbial  
540 Genomics Module (<http://www.clcbio.com>). Low quality reads containing nucleotides with quality  
541 threshold below 0.05 (using the modified Richard Mott algorithm), as well as reads with two or more  
542 unknown nucleotides were removed from analysis. Additionally reads were trimmed to remove  
543 sequenced Nextera adapters. Reference based OTU picking was performed using the SILVA SSU  
544 v128 97% database [88]. Sequences present in more than one copy but not clustered to the database  
545 were then placed into de novo OTUs (97% similarity) and aligned against the reference database with  
546 80% similarity threshold to assign the “closest” taxonomical name where possible. Chimeras were  
547 removed from the dataset if the absolute crossover cost was 3 using a k-mer size of 6. Alpha diversity  
548 was measured using Shannon entropy (OTU level).

549 **Statistical analysis.** Fisher’s exact *post hoc* test in Graphpad Prism 7 was used to compare infection  
550 rates. Normalised qPCR Ct ratios were compared using unpaired t-tests in GraphPad Prism 7.

551

552 **Authors’ contributions.** MK, JO, JB, EH, MLT, FNR, KK, DC, YB, FW, EZM, YAA, ARM, TAA  
553 performed field collections. CLJ, GGL, MK, JO, KS, EH & TW performed sample analysis. CLJ  
554 performed sequence analysis. GG, SH, KK, MP, YF and GLH performed 16S microbiome sample  
555 analysis. SRI, GLH and TW provided overall supervision. CLJ and TW wrote the initial draft.

556

557 **Acknowledgements.** We would like to thank all the mosquito collectors and residents of the villages  
558 where collections took place. We would also like to thank John Gimnig, Bill Hawley and Barb Marston  
559 for reviewing our manuscript. CLJ and TW were supported by a Wellcome Trust /Royal Society grant  
560 awarded to TW (101285/Z/13/Z): <http://www.wellcome.ac.uk>; <https://royalsociety.org>. GLH is  
561 supported by NIH grants (R21AI124452 and R21AI129507), a University of Texas Rising Star award,  
562 the John S. Dunn Foundation Collaborative Research Award, the Robert J. Kleberg, Jr. and Helen C.  
563 Kleberg Foundation, and the Centers for Disease Control and Prevention (CDC) (Cooperative  
564 Agreement Number U01CK000512). The papers contents are solely the responsibility of the authors  
565 and do not necessarily represent the official views of the CDC or the Department of Health and  
566 Human Services. This work was also supported by a James W. McLaughlin postdoctoral fellowship at  
567 the University of Texas Medical Branch to SH. Field work in Uganda was funded by UK aid (through  
568 the Programme Partnership Arrangement grant to Malaria Consortium). YAA and ARM were  
569 supported by a NIH grant R01AI123074. SRI was funded by the U.S. President’s Malaria Initiative.  
570 The funders had no role in study design, data collection and analysis, decision to publish, or  
571 preparation of the manuscript.

572 **Competing interests.** The authors declare no competing interests.

573

574 **References**

- 575 1. Hay SI, Sinka ME, Okara RM, Kabaria CW, Mbithi PM, Tago CC, et al. Developing global  
576 maps of the dominant anopheles vectors of human malaria. *PLoS Med.* 2010/02/18. 2010;7:  
577 e1000209. doi:10.1371/journal.pmed.1000209
- 578 2. Cirimotich CM, Dong Y, Clayton AM, Sandiford SL, Souza-Neto JA, Mulenga M, et al. Natural  
579 microbe-mediated refractoriness to Plasmodium infection in Anopheles gambiae. *Science* (80-  
580 ). 2011/05/14. 2011;332: 855–858. doi:10.1126/science.1201618
- 581 3. Cirimotich CM, Ramirez JL, Dimopoulos G. Native microbiota shape insect vector competence  
582 for human pathogens. *Cell Host and Microbe.* 2011. pp. 307–310.  
583 doi:10.1016/j.chom.2011.09.006
- 584 4. Dennison NJ, Jupatanakul N, Dimopoulos G. The mosquito microbiota influences vector  
585 competence for human pathogens. *Curr Opin Insect Sci.* 2014;3: 6–13.  
586 doi:10.1016/j.cois.2014.07.004
- 587 5. Boissiere A, Tchioffo MT, Bachar D, Abate L, Marie A, Nsango SE, et al. Midgut microbiota of  
588 the malaria mosquito vector Anopheles gambiae and interactions with Plasmodium falciparum  
589 infection. *PLoS Pathog.* 2012/06/14. 2012;8: e1002742. doi:10.1371/journal.ppat.1002742
- 590 6. Dennison NJ, Saraiva RG, Cirimotich CM, Mlambo G, Mongodin EF, Dimopoulos G.  
591 Functional genomic analyses of Enterobacter, Anopheles and Plasmodium reciprocal  
592 interactions that impact vector competence. *Malar J.* 2016;15. doi:10.1186/s12936-016-1468-2
- 593 7. Zug R, Hammerstein P. Still a host of hosts for Wolbachia: analysis of recent data suggests  
594 that 40% of terrestrial arthropod species are infected. *PLoS One.* 2012/06/12. 2012;7: e38544.  
595 doi:10.1371/journal.pone.0038544
- 596 8. Klasson L, Walker T, Sebaihia M, Sanders MJ, Quail MA, Lord A, et al. Genome evolution of  
597 Wolbachia strain wPip from the Culex pipiens group. *Mol Biol Evol.* 2008;25: 1877–1887.  
598 doi:10.1093/molbev/msn133
- 599 9. Laven H. Speciation by cytoplasmic isolation in the Culex pipiens-complex. *Cold Spring Harb*  
600 *Symp Quant Biol.* 1959/01/01. 1959;24: 166–173. Available:  
601 <http://www.ncbi.nlm.nih.gov/pubmed/14414640>
- 602 10. Sinkins SP, Walker T, Lynd AR, Steven AR, Makepeace BL, Godfray HCJ, et al. Wolbachia

- 603 variability and host effects on crossing type in *Culex* mosquitoes. *Nature*. 2005;436: 257–260.  
604 doi:Doi 10.1038/Nature03629
- 605 11. Dutton TJ, Sinkins SP. Strain-specific quantification of *Wolbachia* density in *Aedes albopictus*  
606 and effects of larval rearing conditions. *Insect Mol Biol*. 2004/05/26. 2004;13: 317–322.  
607 doi:10.1111/j.0962-1075.2004.00490.x
- 608 12. Sinkins SP, Braig HR, O'Neill SL. *Wolbachia pipientis*: bacterial density and unidirectional  
609 cytoplasmic incompatibility between infected populations of *Aedes albopictus*. *Exp Parasitol*.  
610 1995/11/01. 1995;81: 284–291. Available: <http://www.ncbi.nlm.nih.gov/pubmed/7498425>
- 611 13. Glaser RL, Meola MA. The native *Wolbachia* endosymbionts of *Drosophila melanogaster* and  
612 *Culex quinquefasciatus* increase host resistance to West Nile virus infection. *PLoS One*.  
613 2010/08/12. 2010;5: e11977. doi:10.1371/journal.pone.0011977
- 614 14. Mousson L, Zouache K, Arias-Goeta C, Raquin V, Mavingui P, Failloux AB. The native  
615 *Wolbachia* symbionts limit transmission of dengue virus in *Aedes albopictus*. *PLoS Negl Trop*  
616 *Dis*. 2013/01/10. 2012;6: e1989. doi:10.1371/journal.pntd.0001989
- 617 15. Silva JBL, Alves DM, Bottino-Rojas V, Pereira TN, Sorgine MHF, Caragata EP, et al.  
618 *Wolbachia* and dengue virus infection in the mosquito *Aedes fluviatilis* (Diptera: Culicidae).  
619 *PLoS One*. 2017;12. doi:10.1371/journal.pone.0181678
- 620 16. Walker T, Johnson PH, Moreira LA, Iturbe-Ormaetxe I, Frentiu FD, McMeniman CJ, et al. The  
621 wMel *Wolbachia* strain blocks dengue and invades caged *Aedes aegypti* populations. *Nature*.  
622 2011;476: 450-U101. doi:Doi 10.1038/Nature10355
- 623 17. Iturbe-Ormaetxe I, Walker T, SL ON. *Wolbachia* and the biological control of mosquito-borne  
624 disease. *EMBO Rep*. 2011/05/07. 2011;12: 508–518. doi:10.1038/embor.2011.84
- 625 18. Joubert DA, Walker T, Carrington LB, De Bruyne JT, Kien DHT, Hoang NLT, et al.  
626 Establishment of a *Wolbachia* Superinfection in *Aedes aegypti* Mosquitoes as a Potential  
627 Approach for Future Resistance Management. *PLoS Pathog*. 2016;12.  
628 doi:10.1371/journal.ppat.1005434
- 629 19. Moreira LA, Iturbe-Ormaetxe I, Jeffery JA, Lu G, Pyke AT, Hedges LM, et al. A *Wolbachia*  
630 symbiont in *Aedes aegypti* limits infection with dengue, Chikungunya, and Plasmodium. *Cell*.  
631 2010/01/13. 2009;139: 1268–1278. doi:10.1016/j.cell.2009.11.042
- 632 20. Bian G, Xu Y, Lu P, Xie Y, Xi Z. The endosymbiotic bacterium *Wolbachia* induces resistance



- 633 to dengue virus in *Aedes aegypti*. *PLoS Pathog*. 2010/04/07. 2010;6: e1000833.  
634 doi:10.1371/journal.ppat.1000833
- 635 21. Blagrove MS, Arias-Goeta C, Failloux AB, Sinkins SP. Wolbachia strain wMel induces  
636 cytoplasmic incompatibility and blocks dengue transmission in *Aedes albopictus*. *Proc Natl*  
637 *Acad Sci U S A*. 2011/11/30. 2012;109: 255–260. doi:10.1073/pnas.1112021108
- 638 22. Bourtzis K, Dobson SL, Xi Z, Rasgon JL, Calvitti M, Moreira LA, et al. Harnessing mosquito-  
639 Wolbachia symbiosis for vector and disease control. *Acta Trop*. 2013/11/21. 2013;  
640 doi:10.1016/j.actatropica.2013.11.004
- 641 23. Hoffmann AA, Montgomery BL, Popovici J, Iturbe-Ormaetxe I, Johnson PH, Muzzi F, et al.  
642 Successful establishment of Wolbachia in *Aedes* populations to suppress dengue  
643 transmission. *Nature*. 2011/08/26. 2011;476: 454–457. doi:10.1038/nature10356
- 644 24. Frentiu FD, Zakir T, Walker T, Popovici J, Pyke AT, van den Hurk A, et al. Limited Dengue  
645 Virus Replication in Field-Collected *Aedes aegypti* Mosquitoes Infected with Wolbachia. *PLoS*  
646 *Negl Trop Dis*. 2014;8. doi:ARTN e2688DOI 10.1371/journal.pntd.0002688
- 647 25. Kittayapong P, Baisley KJ, Baimai V, O'Neill SL. Distribution and diversity of Wolbachia  
648 infections in Southeast Asian mosquitoes (Diptera: Culicidae). *J Med Entomol*. 2000;37: 340–  
649 345. doi:10.1603/0022-2585(2000)037[0340:DADOWI]2.0.CO;2
- 650 26. Tiawsirisup S, Sripatranusorn S, Oraveerakul K, Nuchprayoon S. Distribution of mosquito  
651 (Diptera: Culicidae) species and Wolbachia (Rickettsiales: Rickettsiaceae) infections during  
652 the bird immigration season in Pathumthani province, central Thailand. *Parasitol Res*.  
653 2007/12/11. 2008;102: 731–735. doi:10.1007/s00436-007-0825-z
- 654 27. Wiwatanaratanabutr I. Geographic distribution of wolbachial infections in mosquitoes from  
655 Thailand. *J Invertebr Pathol*. 2013;114: 337–340. doi:10.1016/j.jip.2013.04.011
- 656 28. Ricci I, Cancrini G, Gabrielli S, D'Amelio S, Favi G. Searching for Wolbachia (Rickettsiales:  
657 Rickettsiaceae) in mosquitoes (Diptera: Culicidae): large polymerase chain reaction survey  
658 and new identifications. *J Med Entomol*. 2002/07/30. 2002;39: 562–567. Available:  
659 <http://www.ncbi.nlm.nih.gov/pubmed/12144285>
- 660 29. Rasgon JL, Scott TW. An initial survey for Wolbachia (Rickettsiales: Rickettsiaceae) infections  
661 in selected California mosquitoes (Diptera: Culicidae). *J Med Entomol*. 2004/04/06. 2004;41:  
662 255–257. Available: <http://www.ncbi.nlm.nih.gov/pubmed/15061286>

- 663 30. Walker T, Moreira LA. Can Wolbachia be used to control malaria? Mem Inst Oswaldo Cruz.  
664 2011;106: 212–217.
- 665 31. Hughes GL, Koga R, Xue P, Fukatsu T, Rasgon JL. Wolbachia infections are virulent and  
666 inhibit the human malaria parasite *Plasmodium falciparum* in *Anopheles gambiae*. PLoS  
667 Pathog. 2011/06/01. 2011;7: e1002043. doi:10.1371/journal.ppat.1002043
- 668 32. Hughes GL, Vega-Rodriguez J, Xue P, Rasgon JL. Wolbachia strain wAlbB enhances  
669 infection by the rodent malaria parasite *Plasmodium berghei* in *Anopheles gambiae*  
670 mosquitoes. Appl Env Microbiol. 2012/01/03. 2012;78: 1491–1495. doi:10.1128/AEM.06751-  
671 11
- 672 33. Murdock CC, Blanford S, Hughes GL, Rasgon JL, Thomas MB. Temperature alters  
673 *Plasmodium* blocking by Wolbachia. Sci Rep. 2014/02/04. 2014;4: 3932.  
674 doi:10.1038/srep03932
- 675 34. Hughes GL, Rivero A, Rasgon JL. Wolbachia Can Enhance *Plasmodium* Infection in  
676 Mosquitoes: Implications for Malaria Control? PLoS Pathog. 2014;  
677 doi:10.1371/journal.ppat.1004182
- 678 35. Bian G, Joshi D, Dong Y, Lu P, Zhou G, Pan X, et al. Wolbachia invades *Anopheles stephensi*  
679 populations and induces refractoriness to *Plasmodium* infection. Science (80- ). 2013/05/11.  
680 2013;340: 748–751. doi:10.1126/science.1236192
- 681 36. Hughes GL, Dodson BL, Johnson RM, Murdock CC, Tsujimoto H, Suzuki Y, et al. Native  
682 microbiome impedes vertical transmission of Wolbachia in *Anopheles* mosquitoes. Proc Natl  
683 Acad Sci. 2014;111: 12498–12503. doi:10.1073/pnas.1408888111
- 684 37. Favia G, Ricci I, Damiani C, Raddadi N, Crotti E, Marzorati M, et al. Bacteria of the genus  
685 *Asaia* stably associate with *Anopheles stephensi*, an Asian malarial mosquito vector. Proc Natl  
686 Acad Sci U S A. 2007/05/16. 2007;104: 9047–9051. doi:10.1073/pnas.0610451104
- 687 38. Rossi P, Ricci I, Cappelli A, Damiani C, Ulissi U, Mancini M V, et al. Mutual exclusion of *Asaia*  
688 and Wolbachia in the reproductive organs of mosquito vectors. Parasit Vectors. 2015;8: 278.  
689 doi:10.1186/s13071-015-0888-0
- 690 39. Baldini F, Segata N, Pompon J, Marcenac P, Robert Shaw W, Dabiré RK, et al. Evidence of  
691 natural Wolbachia infections in field populations of *Anopheles gambiae*. Nat Commun. 2014;5.  
692 doi:10.1038/ncomms4985

- 693 40. Gomes FM, Hixson BL, Tyner MDW, Ramirez JL, Canepa GE, Alves e Silva TL, et al. Effect of  
694 naturally occurring *Wolbachia* in *Anopheles gambiae* s.l. mosquitoes from Mali on *Plasmodium*  
695 *falciparum* malaria transmission. Proc Natl Acad Sci. 2017; 201716181.  
696 doi:10.1073/pnas.1716181114
- 697 41. Sinka ME, Bangs MJ, Manguin S, Coetzee M, Mbogo CM, Hemingway J, et al. The dominant  
698 Anopheles vectors of human malaria in Africa, Europe and the Middle East: occurrence data,  
699 distribution maps and bionomic precis. Parasit Vectors. 2010/12/07. 2010;3: 117.  
700 doi:10.1186/1756-3305-3-117
- 701 42. Stevenson J, St Laurent B, Lobo NF, Cooke MK, Kahindi SC, Oriango RM, et al. Novel vectors  
702 of malaria parasites in the western highlands of Kenya. Emerg Infect Dis. 2012/08/31.  
703 2012;18: 1547–1549. doi:10.3201/eid1809.120283
- 704 43. Lobo NF, St. Laurent B, Sikaala CH, Hamainza B, Chanda J, Chinula D, et al. Unexpected  
705 diversity of Anopheles species in Eastern Zambia: Implications for evaluating vector behavior  
706 and interventions using molecular tools. Sci Rep. 2015;5. doi:10.1038/srep17952
- 707 44. Laurent BS, Cooke M, Krishnankutty SM, Asih P, Mueller JD, Kahindi S, et al. Molecular  
708 characterization reveals diverse and unknown malaria vectors in the western Kenyan  
709 highlands. Am J Trop Med Hyg. 2016;94: 327–335. doi:10.4269/ajtmh.15-0562
- 710 45. Werren JH, Windsor DM. Wolbachia infection frequencies in insects: evidence of a global  
711 equilibrium? Proc Biol Sci. 2000/09/06. 2000;267: 1277–1285. doi:10.1098/rspb.2000.1139
- 712 46. Zhou W, Rousset F, O’Neil S. Phylogeny and PCR-based classification of Wolbachia strains  
713 using wsp gene sequences. Proc Biol Sci. 1998/05/07. 1998;265: 509–515.  
714 doi:10.1098/rspb.1998.0324
- 715 47. de Oliveira CD, Goncalves DS, Baton LA, Shimabukuro PH, Carvalho FD, Moreira LA.  
716 Broader prevalence of Wolbachia in insects including potential human disease vectors. Bull  
717 Entomol Res. 2015;105: 305–315. doi:10.1017/S0007485315000085
- 718 48. Kyalo D, Amratia P, Mundia CW, Mbogo CM, Coetzee M, Snow RW. A geo-coded inventory of  
719 anophelines in the Afrotropical Region south of the Sahara: 1898-2016. Wellcome Open Res.  
720 2017;2: 57. doi:10.12688/wellcomeopenres.12187.1
- 721 49. Wiebe A, Longbottom J, Gleave K, Shearer FM, Sinka ME, Massey NC, et al. Geographical  
722 distributions of African malaria vector sibling species and evidence for insecticide resistance.

- 723 Malar J. 2017;16. doi:10.1186/s12936-017-1734-y
- 724 50. Tiffany A, Moundekeno FP, Traoré A, Haile M, Sterk E, Guilavogui T, et al. Encouraging  
725 impact following 2.5 years of reinforced malaria control interventions in a hyperendemic region  
726 of the Republic of Guinea. Malar J. 2016; doi:10.1186/s12936-016-1353-z
- 727 51. Riveron JM, Watsenga F, Irving H, Irish SR, Wondji CS. High Plasmodium Infection Rate and  
728 Reduced Bed Net Efficacy in Multiple Insecticide-Resistant Malaria Vectors in Kinshasa,  
729 Democratic Republic of Congo. J Infect Dis. 2018; doi:10.1093/infdis/jix570
- 730 52. Erlank E, Koekemoer LL, Coetzee M. The importance of morphological identification of African  
731 anopheline mosquitoes (Diptera: Culicidae) for malaria control programmes. Malaria Journal.  
732 2018. doi:10.1186/s12936-018-2189-5
- 733 53. Tabue RN, Awono-Ambene P, Etang J, Atangana J, Antonio-Nkondjio C, Toto JC, et al. Role  
734 of Anopheles (Cellia) rufipes (Gough, 1910) and other local anophelines in human malaria  
735 transmission in the northern savannah of Cameroon: a cross-sectional survey. Parasites and  
736 Vectors. 2017; doi:10.1186/s13071-016-1933-3
- 737 54. Buck M, Nilsson LKJ, Brunius C, Dabiré RK, Hopkins R, Terenius O. Bacterial associations  
738 reveal spatial population dynamics in Anopheles gambiae mosquitoes. Sci Rep. 2016;  
739 doi:10.1038/srep22806
- 740 55. Muturi EJ, Ramirez JL, Rooney AP, Kim C-H. Comparative analysis of gut microbiota of  
741 mosquito communities in central Illinois. PLoS Negl Trop Dis. 2017;  
742 doi:10.1371/journal.pntd.0005377
- 743 56. Shaw WR, Marcenac P, Childs LM, Buckee CO, Baldini F, Sawadogo SP, et al. Wolbachia  
744 infections in natural Anopheles populations affect egg laying and negatively correlate with  
745 Plasmodium development. Nat Commun. 2016;7. doi:10.1038/ncomms11772
- 746 57. Antonio-Nkondjio C, Simard F, Awono-Ambene P, Ngassam P, Toto JC, Tchuinkam T, et al.  
747 Malaria vectors and urbanization in the equatorial forest region of south Cameroon. Trans R  
748 Soc Trop Med Hyg. 2005;99: 347–354. doi:10.1016/j.trstmh.2004.07.003
- 749 58. Cano J, Descalzo MÁ, Moreno M, Chen Z, Nzambo S, Bobuakasi L, et al. Spatial variability in  
750 the density, distribution and vectorial capacity of anopheline species in a high transmission  
751 village (Equatorial Guinea). Malar J. 2006;5: 1–10. doi:10.1186/1475-2875-5-1
- 752 59. Makanga B, Yangari P, Rahola N, Rougeron V, Elguero E, Boundenga L, et al. Ape malaria

- 753 transmission and potential for ape-to-human transfers in Africa. *Proc Natl Acad Sci.* 2016;113:  
754 5329–5334. doi:10.1073/pnas.1603008113
- 755 60. Antonio-Nkondjio C, Ndo C, Kengne P, Mukwaya L, Awono-Ambene P, Fontenille D, et al.  
756 Population structure of the malaria vector *Anopheles moucheti* in the equatorial forest region  
757 of Africa. *Malar J.* 2008;7. doi:10.1186/1475-2875-7-120
- 758 61. Fouet C, Kamdem C, Gamez S, White BJ. Extensive genetic diversity among populations of  
759 the malaria mosquito *Anopheles moucheti* revealed by population genomics. *Infect Genet*  
760 *Evol.* 2017;48: 27–33. doi:10.1016/j.meegid.2016.12.006
- 761 62. Stevenson J, St. Laurent B, Lobo NF, Cooke MK, Kahindi SC, Oriango RM, et al. Novel  
762 vectors of malaria parasites in the western highlands of Kenya. *Emerging Infectious Diseases.*  
763 2012. pp. 1547–1549. doi:org/10.3201/eid1809.120283
- 764 63. Zug R, Koehncke A, Hammerstein P. Epidemiology in evolutionary time: the case of  
765 *Wolbachia* horizontal transmission between arthropod host species. *J Evol Biol.* 2012/09/06.  
766 2012;25: 2149–2160. doi:10.1111/j.1420-9101.2012.02601.x
- 767 64. Bailly-Bechet M, Martins-Simões P, Szölloši GJ, Mialdea G, Sagot MF, Charlat S. How Long  
768 Does *Wolbachia* Remain on Board? *Mol Biol Evol.* 2017; doi:10.1093/molbev/msx073
- 769 65. Minard G, Tran F-H, Dubost A, Tran-Van V, Mavingui P, Valiente Moro C. Pyrosequencing  
770 16S rRNA genes of bacteria associated with wild tiger mosquito *Aedes albopictus*: a pilot  
771 study. *Front Cell Infect Microbiol.* 2014; doi:10.3389/fcimb.2014.00059
- 772 66. Hegde S, Khanipov K, Albayrak L, Golovko G, Pimenova M, Saldana MA, et al. Microbiome  
773 interaction networks and community structure from lab reared and field-collected *Aedes*  
774 *aegypti*, *Aedes albopictus*, and *Culex quinquefasciatus* mosquito vectors. *bioRxiv.* 2018;  
775 Available: <http://dx.doi.org/10.1101/337311>
- 776 67. Walker T, Johnson PH, Moreira LA, Iturbe-Ormaetxe I, Frentiu FD, McMeniman CJ, et al. The  
777 wMel *Wolbachia* strain blocks dengue and invades caged *Aedes aegypti* populations. *Nature.*  
778 2011/08/26. 2011;476: 450–453. doi:10.1038/nature10355
- 779 68. Joubert DA, Walker T, Carrington LB, De Bruyne JT, Kien DHT, Hoang NLT, et al.  
780 Establishment of a *Wolbachia* Superinfection in *Aedes aegypti* Mosquitoes as a Potential  
781 Approach for Future Resistance Management. *PLoS Pathog.* 2016;12.  
782 doi:10.1371/journal.ppat.1005434

- 783 69. Dutra HLC, Rocha MN, Dias FBS, Mansur SB, Caragata EP, Moreira LA. Wolbachia Blocks  
784 Currently Circulating Zika Virus Isolates in Brazilian *Aedes aegypti* Mosquitoes. *Cell Host and*  
785 *Microbe*. 2016. pp. 771–774. doi:10.1016/j.chom.2016.04.021
- 786 70. van den Hurk AF, Hall-Mendelin S, Pyke AT, Frentiu FD, McElroy K, Day A, et al. Impact of  
787 Wolbachia on infection with chikungunya and yellow fever viruses in the mosquito vector  
788 *Aedes aegypti*. *PLoS Negl Trop Dis*. 2012/11/08. 2012;6: e1892.  
789 doi:10.1371/journal.pntd.0001892
- 790 71. Tantely ML, Rakotoniaina JC, Tata E, Andrianaivolambo L, Razafindrasata F, Fontenille D, et  
791 al. Biology of mosquitoes that are potential vectors of Rift Valley Fever virus in different  
792 biotopes of the central highlands of Madagascar. *J Med Entomol*. 2013;50: 603–610.  
793 doi:10.1603/ME12069
- 794 72. Scott JA, Brogdon WG, Collins FH. Identification of 1 Scott JA, Brogdon WG, Collins FH.  
795 Identification of single specimens of the *Anopheles gambiae* complex by the polymerase chain  
796 reaction. *Am J Trop Med Hyg*. 1993;49: 520–529.
- 797 73. Santolamazza F, Mancini E, Simard F, Qi Y, Tu Z, della Torre A. Insertion polymorphisms of  
798 SINE200 retrotransposons within speciation islands of *Anopheles gambiae* molecular forms.  
799 *Malar J*. 2008/08/30. 2008;7: 163. doi:10.1186/1475-2875-7-163
- 800 74. Bass C, Williamson MS, Field LM. Development of a multiplex real-time PCR assay for  
801 identification of members of the *Anopheles gambiae* species complex. *Acta Trop*. 2008/05/21.  
802 2008;107: 50–53. doi:10.1016/j.actatropica.2008.04.009
- 803 75. Cohuet A, Simard F, Toto JC, Kengne P, Coetzee M, Fontenille D. Species identification within  
804 the *Anopheles funestus* group of malaria vectors in Cameroon and evidence for a new  
805 species. *Am J Trop Med Hyg*. 2003/09/19. 2003;69: 200–205. Available:  
806 <http://www.ncbi.nlm.nih.gov/pubmed/13677376>
- 807 76. Beebe NW, Saul A. Discrimination of all members of the *Anopheles punctulatus* complex by  
808 polymerase chain reaction--restriction fragment length polymorphism analysis. *Am J Trop Med*  
809 *Hyg*. 1995/11/01. 1995;53: 478–481. Available: <http://www.ncbi.nlm.nih.gov/pubmed/7485705>
- 810 77. Marie A, Boissiere A, Tsapi MT, Poinignon A, Awono-Ambene PH, Morlais I, et al. Evaluation  
811 of a real-time quantitative PCR to measure the wild *Plasmodium falciparum* infectivity rate in  
812 salivary glands of *Anopheles gambiae*. *Malar J*. 2013/07/04. 2013;12: 224. doi:10.1186/1475-

- 813 2875-12-224
- 814 78. Yamada Y, Katsura K, Kawasaki H, Widyastuti Y, Saono S, Seki T, et al. *Asaia bogorensis*  
815 gen. nov., sp. nov., an unusual acetic acid bacterium in the alpha-Proteobacteria. *Int J Syst*  
816 *Evol Microbiol.* 2000;50 Pt 2: 823–829. doi:10.1099/00207713-50-2-823
- 817 79. Favia G, Ricci I, Damiani C, Raddadi N, Crotti E, Marzorati M, et al. Bacteria of the genus  
818 *Asaia* stably associate with *Anopheles stephensi*, an Asian malarial mosquito vector. *Proc Natl*  
819 *Acad Sci.* 2007;104: 9047–9051. doi:10.1073/pnas.0610451104
- 820 80. Holt RA, Subramanian GM, Halpern A, Sutton GG, Charlab R, Nusskern DR, et al. The  
821 genome sequence of the malaria mosquito *Anopheles gambiae*. *Science* (80- ). 2002;298:  
822 129. doi:10.1126/science.1076181
- 823 81. Coggins SA, Estevez-Lao TY, Hillyer JF. Increased survivorship following bacterial infection by  
824 the mosquito *Aedes aegypti* as compared to *Anopheles gambiae* correlates with increased  
825 transcriptional induction of antimicrobial peptides. *Dev Comp Immunol.* 2012/02/14. 2012;37:  
826 390–401. doi:10.1016/j.dci.2012.01.005
- 827 82. de Oliveira CD, Goncalves DS, Baton LA, Shimabukuro PH, Carvalho FD, Moreira LA.  
828 Broader prevalence of *Wolbachia* in insects including potential human disease vectors. *Bull*  
829 *Entomol Res.* 2015;105: 305–315. doi:10.1017/S0007485315000085
- 830 83. Baldo L, Bordenstein S, Wernegreen JJ, Werren JH. Widespread recombination throughout  
831 *Wolbachia* genomes. *Mol Biol Evol.* 2005/11/04. 2006;23: 437–449.  
832 doi:10.1093/molbev/msj049
- 833 84. Kumar S, Stecher G, Tamura K. MEGA7: Molecular Evolutionary Genetics Analysis Version  
834 7.0 for Bigger Datasets. *Mol Biol Evol.* 2016;33: 1870–1874. doi:10.1093/molbev/msw054
- 835 85. Jolley KA, Chan MS, Maiden MCJ. mlstDbNet - Distributed multi-locus sequence typing  
836 (MLST) databases. *BMC Bioinformatics.* 2004;5. doi:10.1186/1471-2105-5-86
- 837 86. Tamura K, Nei M. Estimation of the number of nucleotide substitutions in the control region of  
838 mitochondrial DNA in humans and chimpanzees. *Mol Biol Evol.* 1993;10: 512–26.  
839 doi:10.1093/molbev/msl149
- 840 87. Klindworth A, Pruesse E, Schweer T, Peplies J, Quast C, Horn M, et al. Evaluation of general  
841 16S ribosomal RNA gene PCR primers for classical and next-generation sequencing-based  
842 diversity studies. *Nucleic Acids Res.* 2013;41. doi:10.1093/nar/gks808

843 88. Quast C, Pruesse E, Yilmaz P, Gerken J, Schweer T, Yarza P, et al. The SILVA ribosomal  
844 RNA gene database project: Improved data processing and web-based tools. *Nucleic Acids*  
845 *Res.* 2013;41. doi:10.1093/nar/gks1219

846

847

848

849

850

851

852

853

854

855

856

857

858

859

860

861

862

863

864

865

866

867

868

869

870

871

872



873 **Figure legends**

874 **Figure 1. Locations of *Anopheles* species collections (including *Wolbachia*-infected species)**  
875 **and *P. falciparum* malaria prevalence rates in mosquitoes (across all species for each**  
876 **location). A)** Overall map showing the five malaria-endemic countries where mosquito collections  
877 were undertaken. **B)** High malaria prevalence rates in Guinea, and *Wolbachia*-infected *An. coluzzii*  
878 from Ghana (no *P. falciparum* detected). **C)** *Wolbachia* strains in *An. gambiae* s.s., *An. arabiensis*, *An.*  
879 *species A* and *An. moucheti* from DRC and variable *P. falciparum* prevalence rate in DRC and  
880 Uganda. **D)** Low *P. falciparum* infection rates in Madagascar and no evidence of resident *Wolbachia*  
881 strains. (W+; *Wolbachia* detected in this species).

882  
883 **Figure 2. Maximum Likelihood molecular phylogenetic analysis of *Anopheles gambiae***  
884 **complex ITS2 sequences from field-collected mosquitoes.** The tree with the highest log likelihood  
885 (-785.65) is shown. The tree is drawn to scale, with branch lengths measured in the number of  
886 substitutions per site. The analysis involved 42 nucleotide sequences. There were a total of 475  
887 positions in the final dataset. DRC = Democratic Republic of the Congo (red): KAL = Kalemie, MIK =  
888 Mikalayi, KIN = Kinshasa, KAT = Katana. GHA = Ghana (blue): DOG = Dogo. GUI = Guinea (green):  
889 KSK = Kissidougou. MAD = Madagascar (purple): ANT = Antafia. UGA = Uganda (maroon): BUT =  
890 Butemba. (W+; individual was *Wolbachia* positive, W-; individual was *Wolbachia* negative).

891  
892 **Figure 3. Maximum Likelihood molecular phylogenetic analysis of *Anopheles* ITS2 sequences**  
893 **from field-collected mosquitoes outside of the *An. gambiae* s.l. complex.** The tree with the  
894 highest log likelihood (-3084.12) is shown. The tree is drawn to scale, with branch lengths measured  
895 in the number of substitutions per site. The analysis involved 118 nucleotide sequences. There were a  
896 total of 156 positions in the final dataset. DRC = Democratic Republic of the Congo (red): KAT =  
897 Katana, LWI = Lwiro, MIK = Mikalayi. GUI = Guinea (green): FAR = Faranah, KAN = Kankan, KSK =  
898 Kissidougou. MAD = Madagascar (purple): AMB = Ambomiharina. (W+; individual was *Wolbachia*  
899 positive, W-; individual was *Wolbachia* negative).

900  
901 **Figure 4. Resident *Wolbachia* strain phylogenetic analysis using 16S rRNA and *wsp* genes. A)**  
902 **Maximum Likelihood molecular phylogenetic analysis of the 16S rRNA gene for resident strains in *An.***  
903 ***coluzzii* (wAnga-Ghana; blue), *An. moucheti* (wAnM; green) and *An. species A* (wAnsA; red). The tree**  
904 **with the highest log likelihood (-660.03) is shown. The tree is drawn to scale, with branch lengths**  
905 **measured in the number of substitutions per site. The analysis involved 17 nucleotide sequences.**  
906 **There were a total of 333 positions in the final dataset. Accession numbers of additional sequences**  
907 **obtained from GenBank are shown, including wPip (navy blue), wAnga-Mali (purple) and wAnga-**  
908 **Burkina Faso strains (maroon). B)** **Maximum Likelihood molecular phylogenetic analysis of the *wsp***  
909 **gene for wAnsA-infected representative individuals from the DRC (red). (KAT = Katana, LWI = Lwiro.)**  
910 **The tree with the highest log likelihood (-3663.41) is shown. The tree is drawn to scale, with branch**  
911 **lengths measured in the number of substitutions per site. The analysis involved 83 nucleotide**  
912 **sequences. There were a total of 443 positions in the final dataset. Reference numbers of additional**

913 sequences obtained from the MLST database (IsoN = Isolate number) or GenBank (accession  
914 number) are shown. Strains isolated from mosquitoes are highlighted in navy blue.

915

916 **Figure 5. *Wolbachia* MLST phylogenetic analysis of resident *Wolbachia* strains in *An. coluzzii*,**

917 ***An. moucheti* and *An. species A*. A)** Maximum Likelihood molecular phylogenetic analysis from  
918 concatenation of all five MLST gene loci for resident *Wolbachia* strains from *An. coluzzii* (*w*Anga-  
919 Ghana; blue), *An. moucheti* (*w*AnM; green) and *An. species A* (*w*AnsA; red). The tree with the highest  
920 log likelihood (-10606.13) is shown and drawn to scale, with branch lengths measured in the number  
921 of substitutions per site. The analysis involved 94 nucleotide sequences. There were a total of 2067  
922 positions in the final dataset. Concatenated sequence data from *Wolbachia* strains downloaded from  
923 MLST database for comparison shown with isolate numbers in brackets (IsoN). *Wolbachia* strains  
924 isolated from mosquito species highlighted in navy blue, bold. Strains isolated from other Dipteran  
925 species are shown in navy blue, from Coleoptera in olive green, from Hemiptera in purple, from  
926 Hymenoptera in teal blue, from Lepidoptera in maroon and from other, or unknown orders in black.

927 **B).** Maximum Likelihood molecular phylogenetic analysis for *coxA* gene locus for resident *Wolbachia*  
928 strains from *An. coluzzii* (*w*Anga-Ghana; blue), *An. moucheti* (*w*AnM; green) and *An. species A*  
929 (*w*AnsA and *w*AnsA(2); red). The tree with the highest log likelihood (-1921.11) is shown and drawn to  
930 scale, with branch lengths measured in the number of substitutions per site. The analysis involved 84  
931 nucleotide sequences. There were a total of 402 positions in the final dataset. Sequence data for the  
932 *coxA* locus from *Wolbachia* strains downloaded from MLST database for comparison shown in black  
933 and navy blue with isolate numbers (IsoN) from MLST database shown in brackets. *Wolbachia* strains  
934 isolated from mosquito species highlighted in navy blue. GenBank sequence for *w*Anga-Mali *coxA*  
935 shown in maroon with accession number.

936

937 **Figure 6. The relative abundance of resident *Wolbachia* strains in *Anopheles*.** Bacterial genus  
938 level taxonomy was assigned to OTUs clustered with a 97% cut-off using the SILVA SSU v128 97%  
939 database, and individual genera comprising less than 1% of total abundance was merged into  
940 “Others”.

941

942 **Figure 7. The relative abundance of bacteria in *An. gambiae* s.s. comparing two locations with**  
943 **contrasting *Asaia* infection densities.** Bacterial genus level taxonomy was assigned to OTUs  
944 clustered with a 97% cut-off using the SILVA SSU v128 97% database, and individual genera  
945 comprising less than 1% of total abundance was merged into “Others”.

946

947 **Supplementary Figure S1. Alpha and beta diversity of *An. gambiae* s.s. from Kissidougou,**  
948 **Guinea and Butemba, Uganda. A)** Alpha diversity using the Shannon diversity index shows the  
949 relative abundance of bacterial genera. **B)** To identify dissimilarities in the bacterial community  
950 structure between the microbiome, principal coordinates analysis (PCoA) was performed based on a  
951 Bray-Curtis dissimilarity matrix based on 97% clustered OTUs.

952 **Supplementary Figure S2. Prevalence of the bacterial endosymbiont *Asaia* and malaria**  
953 **parasites in *An. gambiae* s.s. mosquitoes from Guinea. A)** Normalised *P. falciparum*: *An. gambiae*  
954 gene Ct ratio for mosquitoes that are infected with malaria and +/- *Asaia* bacteria. **B)** *P. falciparum*  
955 and *Asaia* infection rates (%) in 152 *An. gambiae* s.s. females. **C)** Box and whisker plot of Ct values  
956 for detection of *Asaia* and *P. falciparum* malaria showing more variable levels of *Asaia* detected.

957

958

959

960

961

962

963

964

965

966

967

968

969

970

971

972

973

974

975

976

977

978

979

980

981

982

983

984

985

986

987

988

989

990

991

992

993 **Table 1.** *Anopheles* mosquito species collected from locations within five malaria-endemic countries  
 994 and *P. falciparum*, *Wolbachia* and *Asaia* prevalence rates. Species in different locations infected with  
 995 *Wolbachia* are in bold. \*Adult individuals from Lwiro (Katana), DRC were collected as both larvae and  
 996 adults so have been excluded from *P. falciparum* and *Asaia* prevalence analysis.  
 997

| Country                  | Location                | Species                        | Individuals | Infection prevalence (%) |                  |              |
|--------------------------|-------------------------|--------------------------------|-------------|--------------------------|------------------|--------------|
|                          |                         |                                |             | <i>P. falciparum</i>     | <i>Wolbachia</i> | <i>Asaia</i> |
| Guinea                   | Faranah                 | <i>An. gambiae</i> s.s.        | 48          | 43.8                     | 0.0              | 50.0         |
|                          |                         | <i>An. arabiensis</i>          | 7           | 0.0                      | 0.0              | 100.0        |
|                          |                         | <i>An. nili</i>                | 9           | 0.0                      | 0.0              | 100.0        |
|                          | Kissidougou             | <i>An. gambiae</i> s.s.        | 44          | 18.2                     | 0.0              | 100.0        |
|                          |                         | <i>An. species O</i>           | 1           | 0.0                      | 0.0              | 100.0        |
|                          | Boke                    | <i>An. gambiae</i> s.s.        | 21          | 52.4                     | 0.0              | 28.6         |
| Kankan                   | <i>An. gambiae</i> s.s. | 48                             | 38.1        | 0.0                      | 56.3             |              |
|                          | <i>An. sp. unknown</i>  | 1                              | 0.0         | 0.0                      | 0.0              |              |
| DRC                      | Mikalayi                | <b><i>An. gambiae</i> s.s.</b> | 16          | 29.4                     | 11.8             | 11.8         |
|                          |                         | <b><i>An. moucheti</i></b>     | 1           | 0.0                      | 100.0            | 0.0          |
|                          |                         | <i>An. funestus</i> s.s.       | 13          | 30.8                     | 0.0              | 15.4         |
|                          | Kisangani               | <i>An. gambiae</i> s.s.        | 25          | 12.0                     | 8.0              | 20.0         |
|                          |                         | <i>An. arabiensis</i>          | 4           | 25.0                     | 0.0              | 0.0          |
|                          | Katana                  | <i>An. gambiae</i> s.s.        | 23          | 8.7                      | 8.7              | 4.4          |
|                          |                         | <i>An. funestus</i> s.s.       | 5           | 0.0                      | 0.0              | 0.0          |
|                          |                         | <b><i>An. species A</i></b>    | 2           | 50.0                     | 100.0            | 0.0          |
|                          | Lwiro (Katana)          | <b><i>An. species A</i>*</b>   | 33          | N/A                      | 90.1             | N/A          |
|                          | Kapolowe                | <i>An. gambiae</i> s.s.        | 9           | 11.1                     | 11.1             | 0.0          |
|                          |                         | <i>An. funestus</i> s.s.       | 5           | 20.0                     | 0.0              | 0.0          |
|                          | Kalemie                 | <b><i>An. gambiae</i> s.s.</b> | 28          | 7.1                      | 21.4             | 3.6          |
|                          |                         | <b><i>An. arabiensis</i></b>   | 2           | 0.0                      | 50.0             | 0.0          |
|                          | Kinshasa                | <b><i>An. gambiae</i> s.s.</b> | 27          | 22.2                     | 14.8             | 3.7          |
| <i>An. funestus</i> s.s. |                         | 2                              | 50.0        | 0.0                      | 0.0              |              |
| Ghana                    | Dogo                    | <b><i>An. coluzzii</i></b>     | 286         | 0.0                      | 4.2              | 32.9         |
|                          |                         | <i>An. melas</i>               | 1           | 0.0                      | 0.0              | 100.00       |
| Uganda                   | Butemba (2013)          | <i>An. gambiae</i> s.s.        | 57          | 19.3                     | 0.0              | 80.7         |
|                          | Butemba (2014)          | <i>An. gambiae</i> s.s.        | 135         | 36.3                     | 0.0              | 48.1         |
|                          |                         | <i>An. arabiensis</i>          | 1           | 0.0                      | 0.0              | 0.0          |
| Madagascar               | Anivorano Nord          | <i>An. funestus</i>            | 8           | 0.0                      | 0.0              | 25.0         |
|                          |                         | <i>An. gambiae</i> s.s.        | 3           | 0.0                      | 0.0              | 33.3         |
|                          |                         | <i>An. arabiensis</i>          | 2           | 0.0                      | 0.0              | 100.0        |
|                          |                         | <i>An. mascarensis</i>         | 38          | 0.0                      | 0.0              | 39.5         |
|                          |                         | <i>An. maculipalpis</i>        | 9           | 0.0                      | 0.0              | 11.1         |
|                          |                         | <i>An. coustani</i>            | 22          | 0.0                      | 0.0              | 27.3         |
|                          |                         | <i>An. rufipes</i>             | 11          | 0.0                      | 0.0              | 27.3         |
|                          | Ambomiharina            | <i>An. funestus</i>            | 12          | 0.0                      | 0.0              | 83.3         |
|                          |                         | <i>An. pharoensis</i>          | 7           | 0.0                      | 0.0              | 42.9         |
|                          |                         | <i>An. rufipes</i>             | 19          | 10.5                     | 0.0              | 68.4         |
|                          |                         | <i>An. maculipalpis</i>        | 9           | 0.0                      | 0.0              | 0.0          |
|                          |                         | <i>An. gambiae</i> s.s.        | 8           | 0.0                      | 0.0              | 0.0          |
|                          |                         | <i>An. coustani</i>            | 24          | 0.0                      | 0.0              | 25.0         |
|                          |                         | <i>An. squamosus</i>           | 10          | 0.0                      | 0.0              | 20.0         |
|                          | Antafia                 | <i>An. mascarensis</i>         | 2           | 0.0                      | 0.0              | 50.0         |
|                          |                         | <i>An. gambiae</i> s.s.        | 11          | 27.3                     | 0.0              | 45.5         |
|                          |                         | <i>An. pauliani</i>            | 2           | 0.0                      | 0.0              | 50.0         |
|                          |                         | <i>An. rufipes</i>             | 2           | 0.0                      | 0.0              | 50.0         |
|                          | Ambohimarina            | <i>An. mascarensis</i>         | 2           | 0.0                      | 0.0              | 0.0          |
|                          |                         | <i>An. funestus</i>            | 1           | 0.0                      | 0.0              | 0.0          |
|                          |                         | <i>An. gambiae</i> s.s.        | 1           | 0.0                      | 0.0              | 0.0          |
|                          |                         | <i>An. arabiensis</i>          | 2           | 0.0                      | 0.0              | 0.0          |
|                          |                         | <i>An. rufipes</i>             | 7           | 0.0                      | 0.0              | 42.9         |
| <i>An. coustani</i>      |                         | 18                             | 0.0         | 0.0                      | 11.1             |              |
| <i>An. maculipalpis</i>  |                         | 8                              | 0.0         | 0.0                      | 12.5             |              |
| <i>An. squamosus</i>     | 52                      | 0.0                            | 0.0         | 3.9                      |                  |              |
| <i>An. mascarensis</i>   | 11                      | 0.0                            | 0.0         | 0.0                      |                  |              |

998  
 999  
 1000

1001 **Table 2. Novel resident *Wolbachia* strain *wsp* and MLST gene allelic profiles.** Exact matches to  
 1002 existing alleles present in the database are shown in bold, novel alleles are denoted by the allele  
 1003 number of the closest match and shown in red (number of single nucleotide differences to the closest  
 1004 match). \*alternative degenerate primers (set 3) used to generate sequence.  
 1005

| Mosquito species     | <i>Wolbachia</i> strain | <i>Wolbachia</i> gene allele |             |             |             |             |             |
|----------------------|-------------------------|------------------------------|-------------|-------------|-------------|-------------|-------------|
|                      |                         | <i>wsp</i>                   | <i>gatB</i> | <i>coxA</i> | <i>hcpA</i> | <i>ftsZ</i> | <i>fbpA</i> |
| <i>An. species A</i> | wAnsA                   | 152 (34)                     | 140 (4)     | 122 (16)    | 6 (7)       | 7 (1)       | 10 (1)      |
| <i>An. species A</i> | wAnsA(2)                | 152 (34)                     | -           | 36 (1)      | 6 (7)       | -           | -           |
| <i>An. moucheti</i>  | wAnM                    | -                            | 9 (2)       | 11 (1)      | 74 (3)      | 7 (2)       | 7 (12)      |
| <i>An. coluzzii</i>  | wAnga-Ghana             | -                            | 9           | 64          | 3*          | 177         | 4           |

1006

1007 **Supplementary Table 1. Additional sample details and ITS2 GenBank accession numbers.**

| Location            | Species                       | Sample ID | <i>Wolbachia</i> status | ITS2 accession number |
|---------------------|-------------------------------|-----------|-------------------------|-----------------------|
| Guinea: Kissidougou | <i>Anopheles</i> sp. O/15     | GUI-KSK1  | W-                      | MH598414              |
| Guinea: Kissidougou | <i>Anopheles gambiae</i> s.s. | GUI-KSK2  | W-                      | MH598415              |
| Guinea: Faranah     | <i>Anopheles nili</i>         | GUI-FAR1  | W-                      | MH598416              |
| Guinea: Faranah     | <i>Anopheles nili</i>         | GUI-FAR2  | W-                      | MH598417              |
| Guinea: Kankan      | <i>Anopheles</i> sp. unknown  | GUI-KAN1  | W-                      | MH598418              |
| DRC: Lwiro          | <i>Anopheles</i> sp. A/1      | DRC-LWI1  | W+                      | MH598419              |
| DRC: Lwiro          | <i>Anopheles</i> sp. A/1      | DRC-LWI2  | W+                      | MH598420              |
| DRC: Lwiro          | <i>Anopheles</i> sp. A/1      | DRC-LWI3  | W+                      | MH598421              |
| DRC: Katana         | <i>Anopheles</i> sp. A/1      | DRC-KAT1  | W+                      | MH598422              |
| DRC: Katana         | <i>Anopheles</i> sp. A/1      | DRC-KAT2  | W+                      | MH598423              |
| DRC: Mikalayi       | <i>Anopheles moucheti</i>     | DRC-MIK1  | W+                      | MH598424              |
| DRC: Kinshasa       | <i>Anopheles gambiae</i> s.s. | DRC-KIN1  | W+                      | MH598425              |
| DRC: Mikalayi       | <i>Anopheles gambiae</i> s.s. | DRC-MIK2  | W+                      | MH598426              |
| DRC: Kalemie        | <i>Anopheles gambiae</i> s.s. | DRC-KAL1  | W+                      | MH598427              |
| DRC: Kalemie        | <i>Anopheles arabiensis</i>   | DRC-KAL2  | W+                      | MH598428              |
| DRC: Katana         | <i>Anopheles gambiae</i> s.s. | DRC-KAT3  | W-                      | MH598429              |
| Ghana: Dogo         | <i>Anopheles coluzzii</i>     | GHA-DOG1  | W+                      | MH598430              |
| Ghana: Dogo         | <i>Anopheles coluzzii</i>     | GHA-DOG2  | W+                      | MH598431              |
| Ghana: Dogo         | <i>Anopheles coluzzii</i>     | GHA-DOG3  | W+                      | MH598432              |
| Ghana: Dogo         | <i>Anopheles coluzzii</i>     | GHA-DOG4  | W-                      | MH598433              |
| Ghana: Dogo         | <i>Anopheles coluzzii</i>     | GHA-DOG5  | W-                      | MH598434              |
| Ghana: Dogo         | <i>Anopheles melas</i>        | GHA-DOG6  | W-                      | MH598435              |

|                          |                               |          |    |          |
|--------------------------|-------------------------------|----------|----|----------|
| Uganda: Butemba          | <i>Anopheles gambiae</i> s.s. | UGA-BUT1 | W- | MH598436 |
| Uganda: Butemba          | <i>Anopheles gambiae</i> s.s. | UGA-BUT2 | W- | MH598437 |
| Uganda: Butemba          | <i>Anopheles gambiae</i> s.s. | UGA-BUT3 | W- | MH598438 |
| Uganda: Butemba          | <i>Anopheles gambiae</i> s.s. | UGA-BUT4 | W- | MH598439 |
| Uganda: Butemba          | <i>Anopheles arabiensis</i>   | UGA-BUT5 | W- | MH598440 |
| Madagascar: Antafia      | <i>Anopheles gambiae</i> s.s. | MAD-ANT1 | W- | MH598441 |
| Madagascar: Antafia      | <i>Anopheles gambiae</i> s.s. | MAD-ANT2 | W- | MH598442 |
| Madagascar: Antafia      | <i>Anopheles gambiae</i> s.s. | MAD-ANT3 | W- | MH598443 |
| Madagascar: Ambomiharina | <i>Anopheles rufipes</i>      | MAD-AMB1 | W- | MH598444 |
| Madagascar: Ambomiharina | <i>Anopheles rufipes</i>      | MAD-AMB2 | W- | MH598445 |

1008

1009 **Supplementary Table 2. *Wolbachia* 16S and wsp GenBank accession numbers**

| Sample ID | Strain      | 16S      | wsp      |
|-----------|-------------|----------|----------|
| DRC-LWI1  | wAnsA       | MH605275 | MH605281 |
| DRC-LWI2  | wAnsA       | MH605276 | MH605282 |
| DRC-LWI3  | wAnsA       | MH605277 | MH605283 |
| DRC-KAT1  | wAnsA       | -        | MH605284 |
| DRC-KAT2  | wAnsA(2)    | -        | MH605285 |
| DRC-MIK1  | wAnM        | MH605278 | -        |
| GHA-DOG1  | wAnga-Ghana | MH605279 | -        |
| GHA-DOG2  | wAnga-Ghana | MH605280 | -        |

1010

1011 **Supplementary Table 3. *Wolbachia* MLST gene GenBank accession numbers**

| Sample ID | Strain      | gatB     | coxA     | hcpA     | ftsZ     | fbpA     |
|-----------|-------------|----------|----------|----------|----------|----------|
| DRC-LWI1  | wAnsA       | MH605286 | MH605290 | MH605295 | MH605299 | MH605302 |
| DRC-KAT1  | wAnsA       | MH605287 | MH605291 | -        | -        | MH605303 |
| DRC-KAT2  | wAnsA(2)    | -        | MH605292 | MH605296 | -        | -        |
| DRC-MIK1  | wAnM        | MH605288 | MH605293 | MH605297 | MH605300 | MH605304 |
| GHA-DOG1  | wAnga-Ghana | MH605289 | MH605294 | -        | MH605301 | MH605305 |
| GHA-DOG2  | wAnga-Ghana | -        | -        | MH605298 | -        | -        |

1012

Figure 1

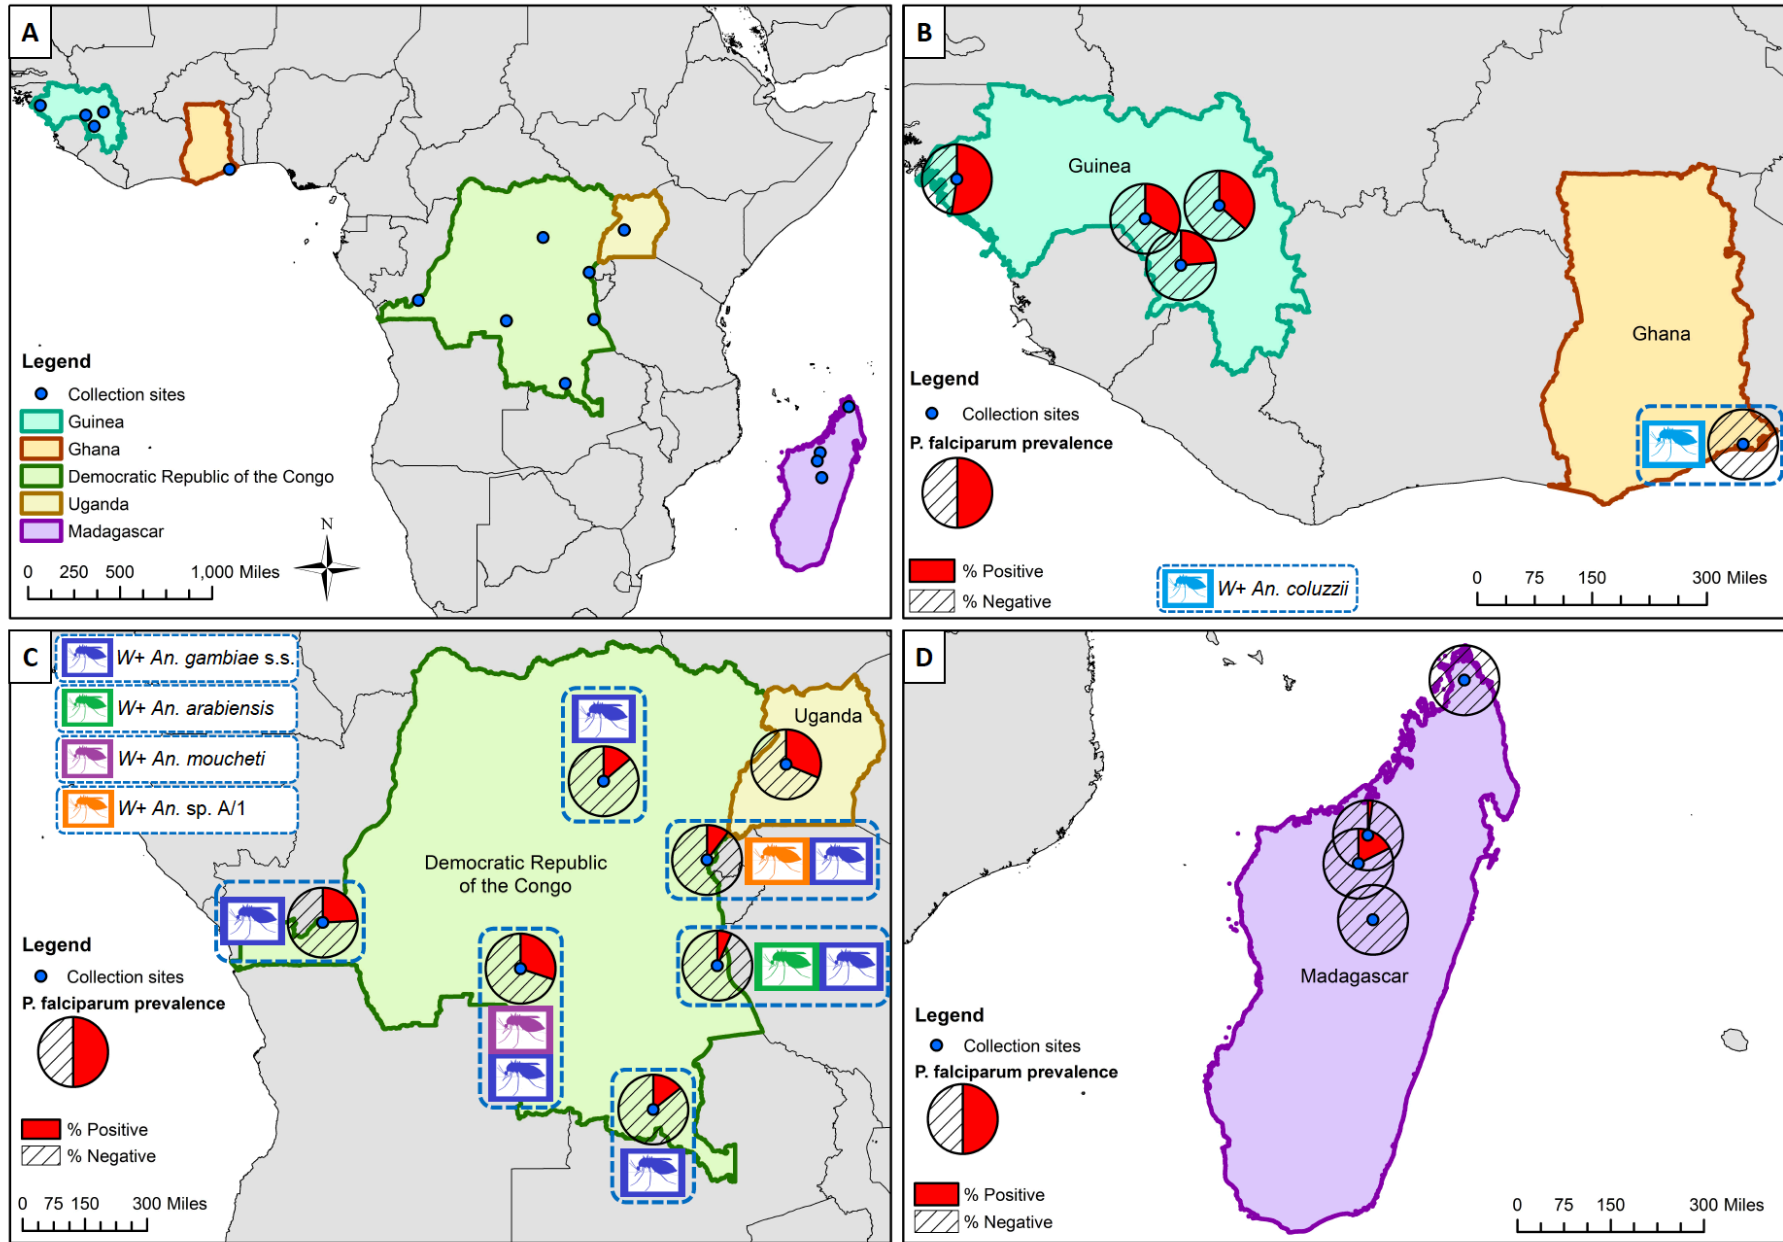

Figure 2

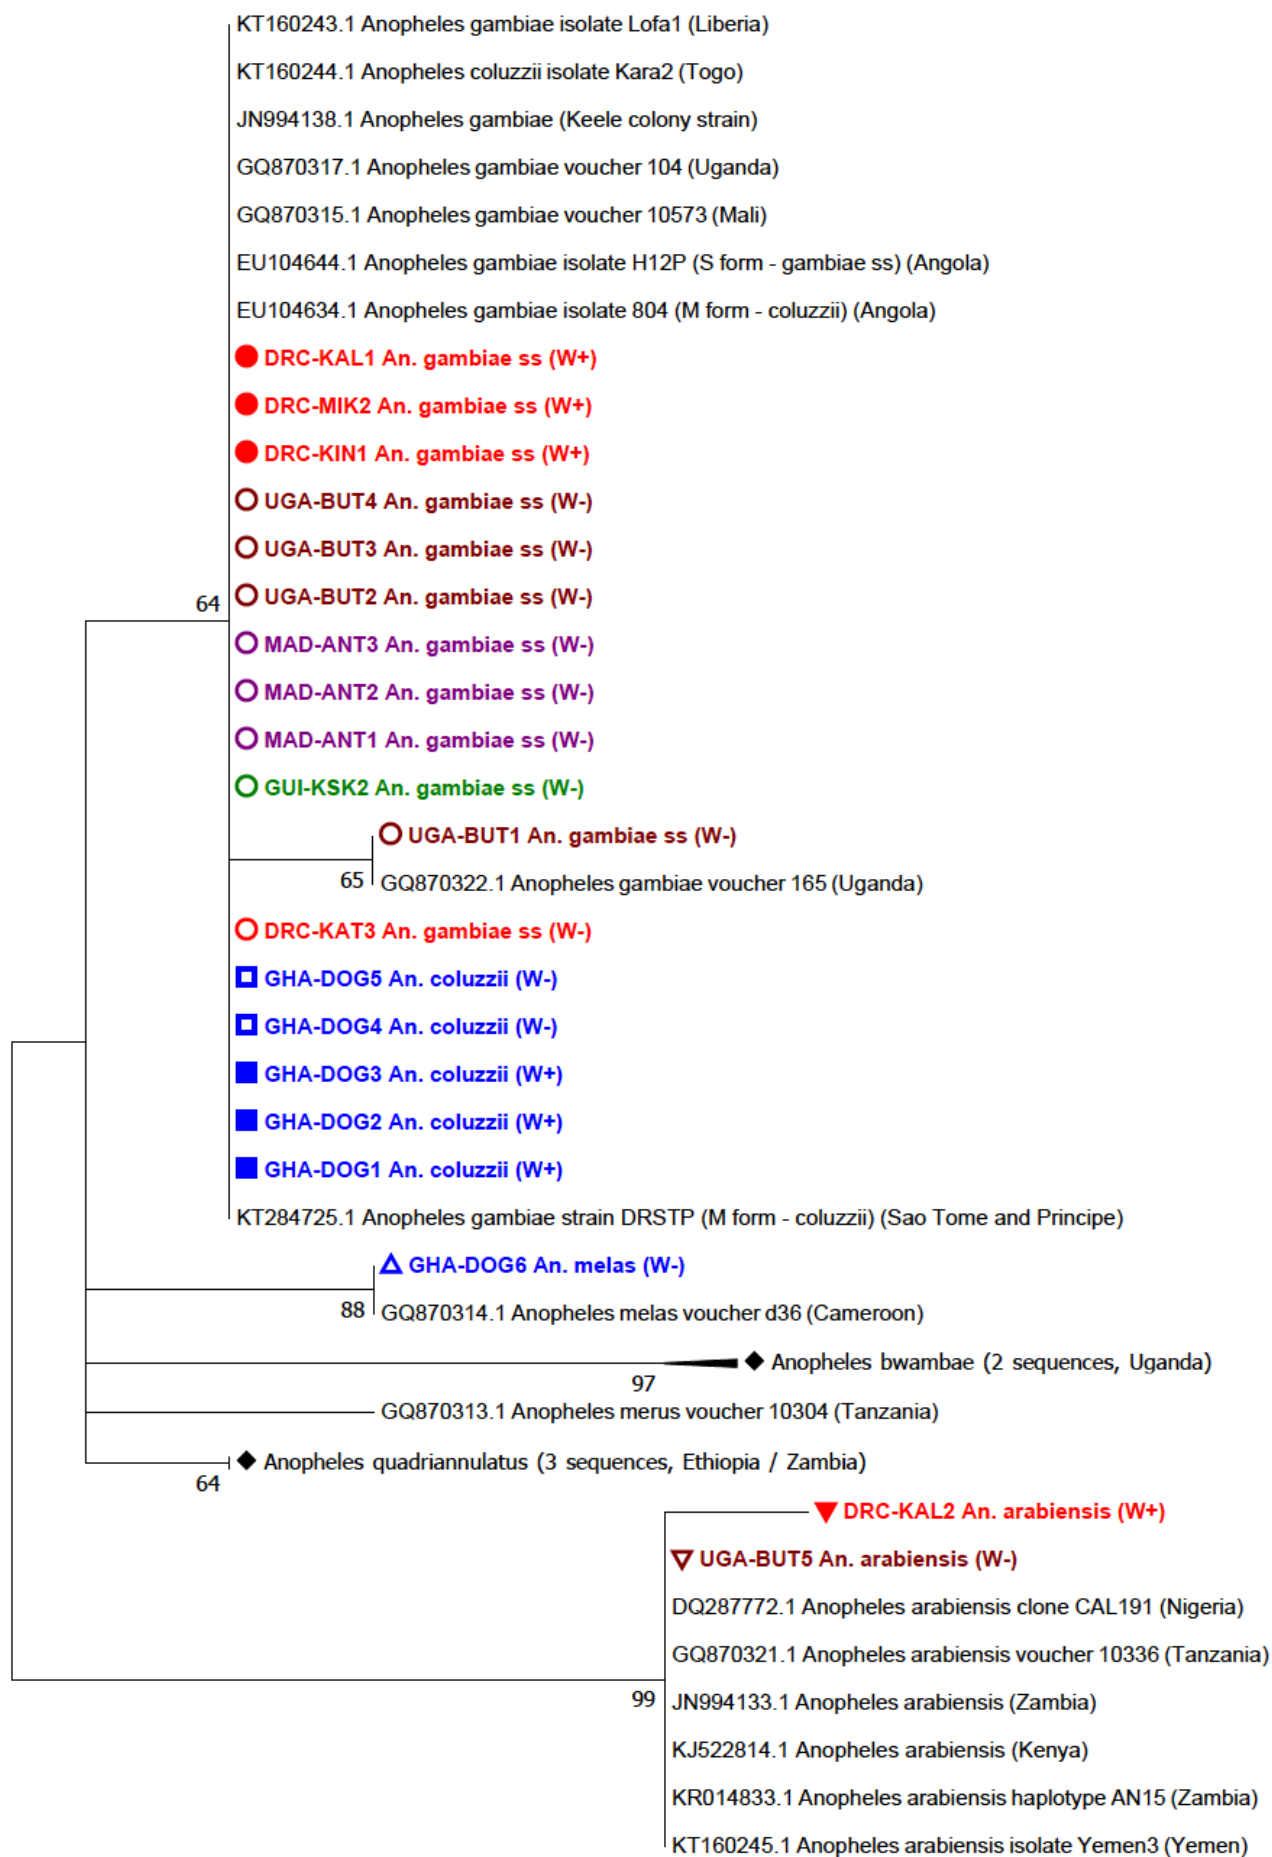

0.001



Figure 3

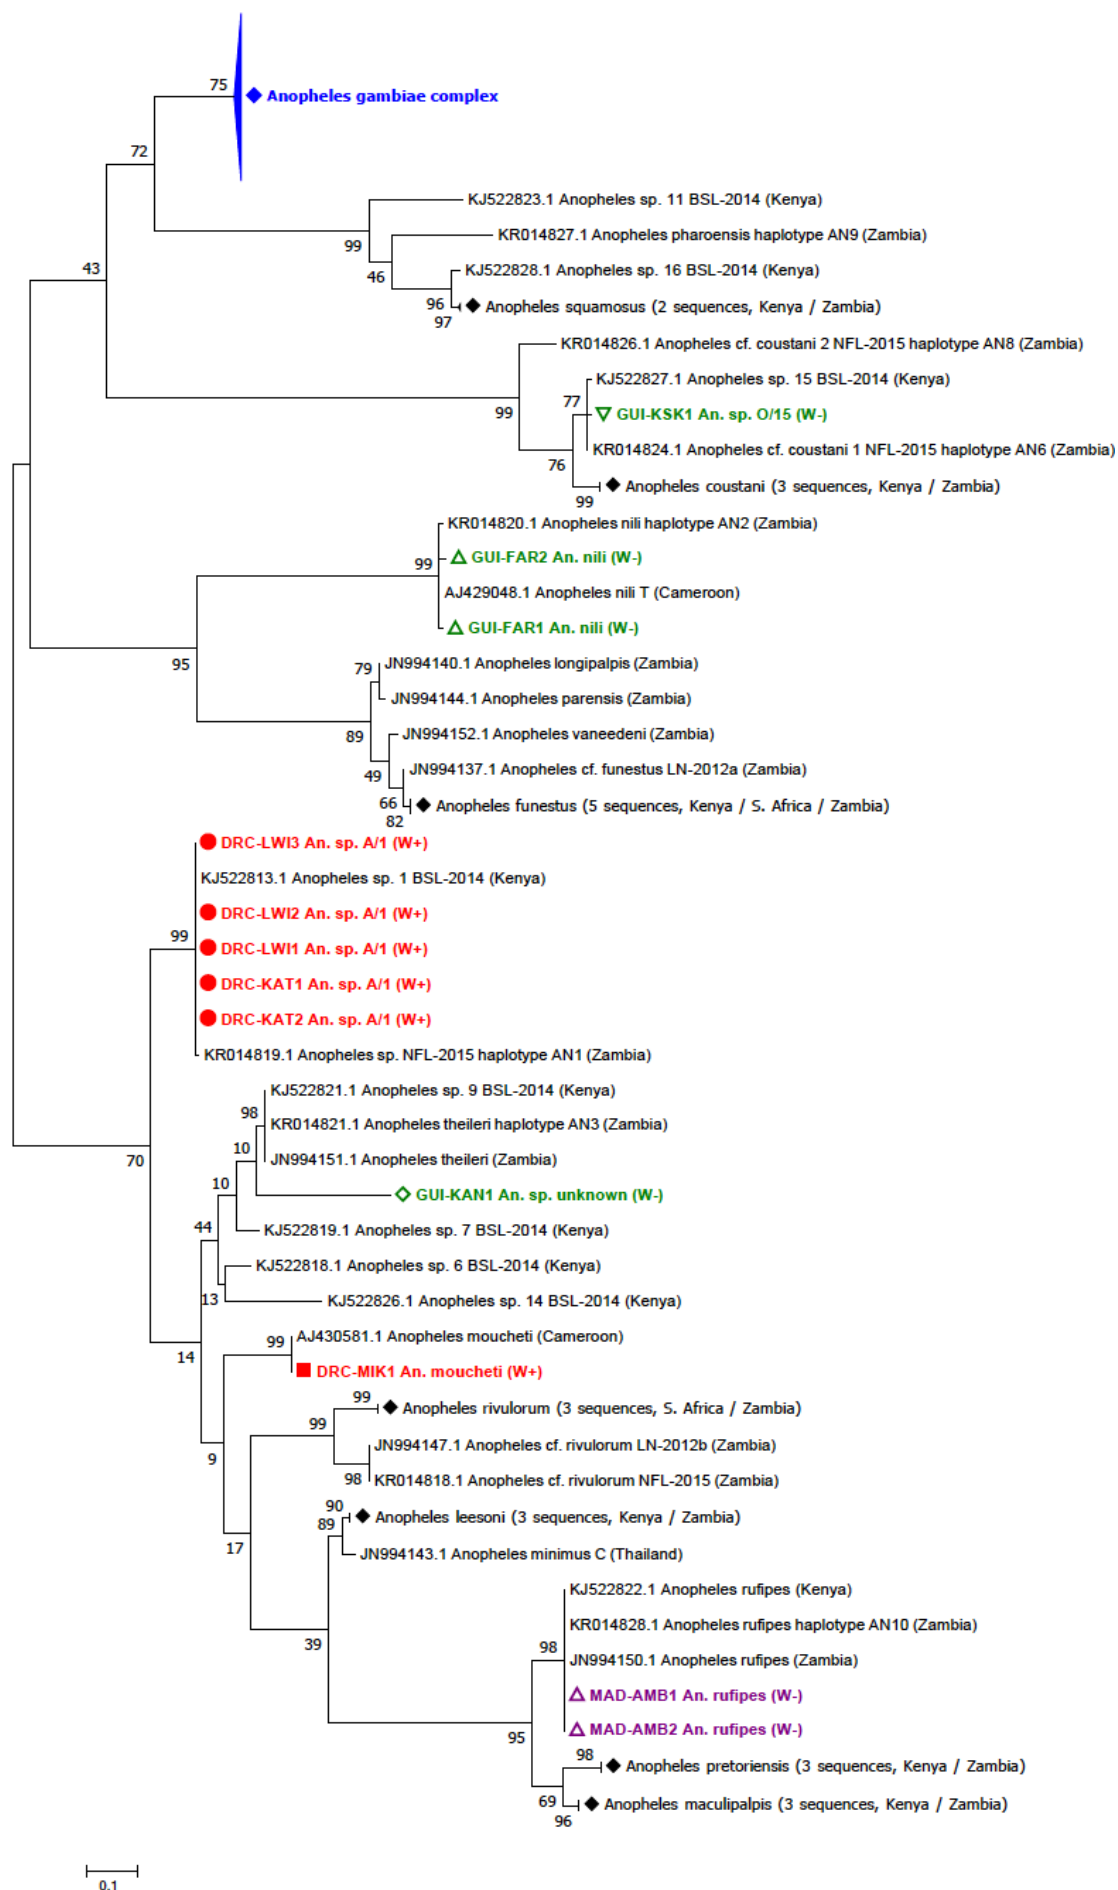

Figure 4

A

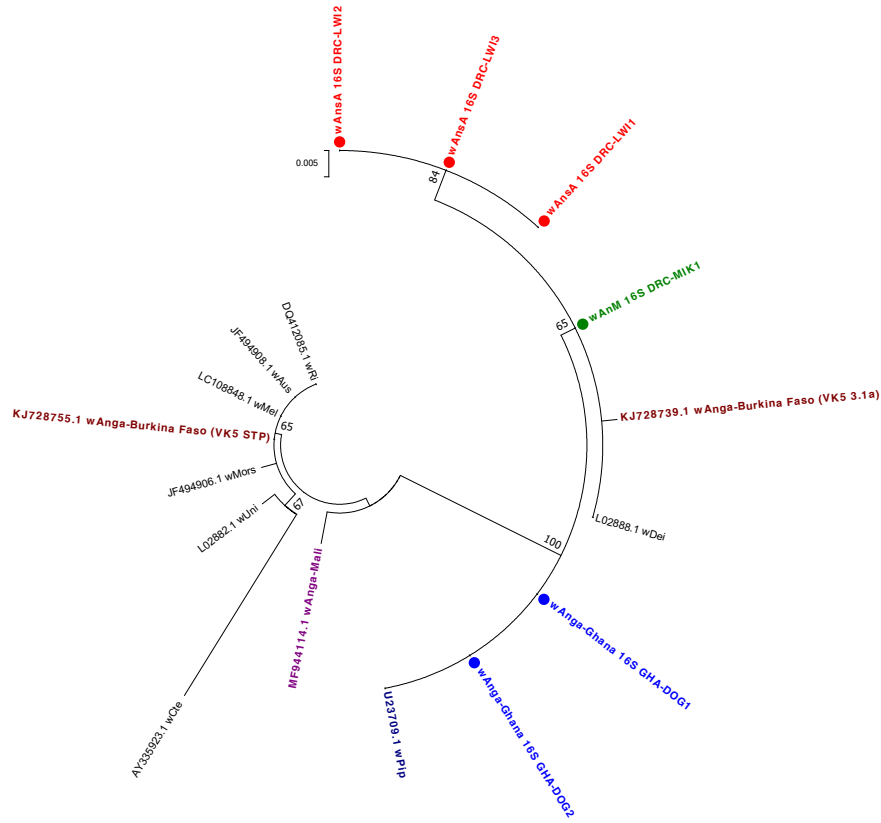

B

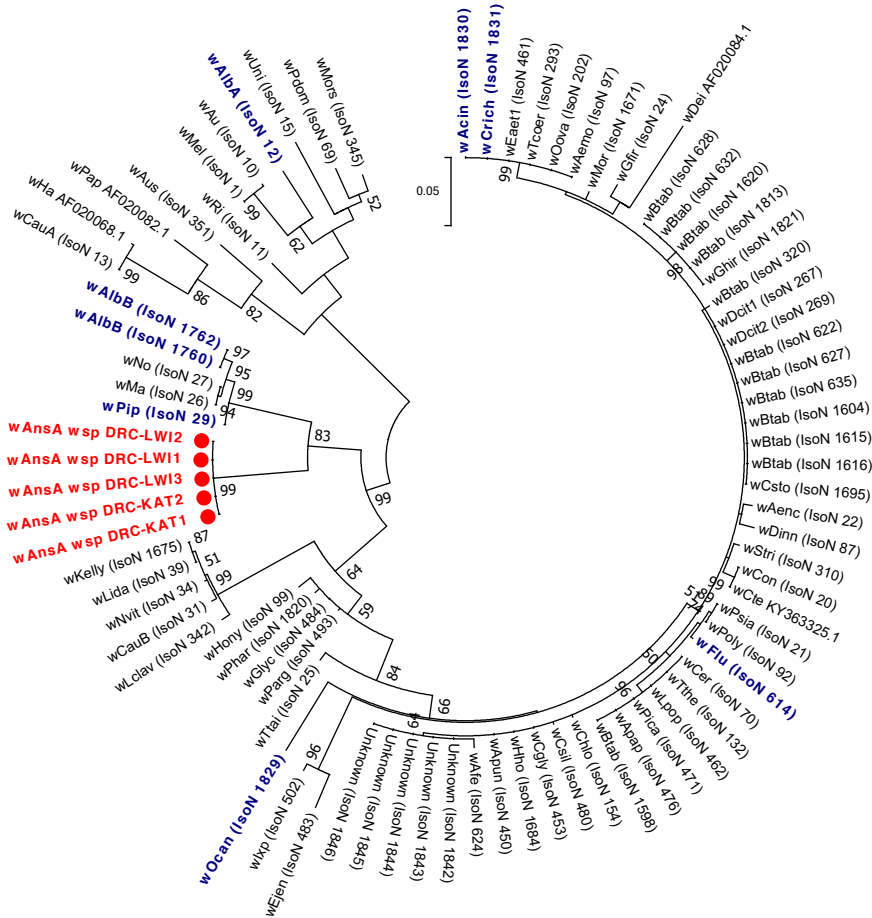

Figure 5

A

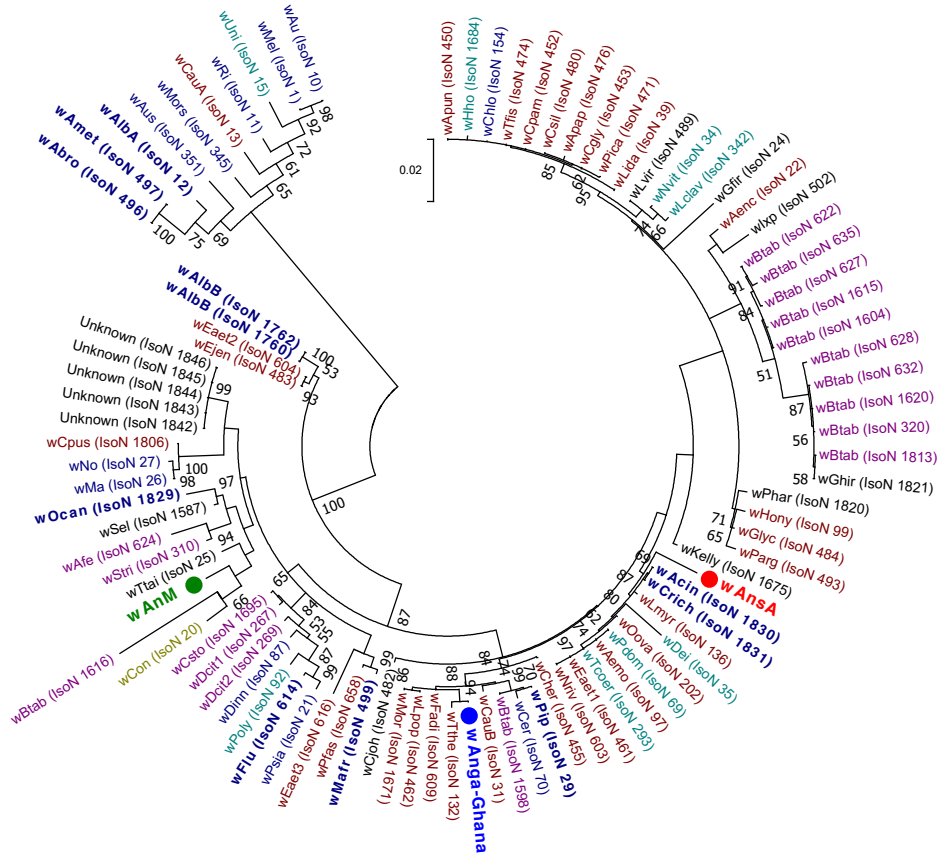

B

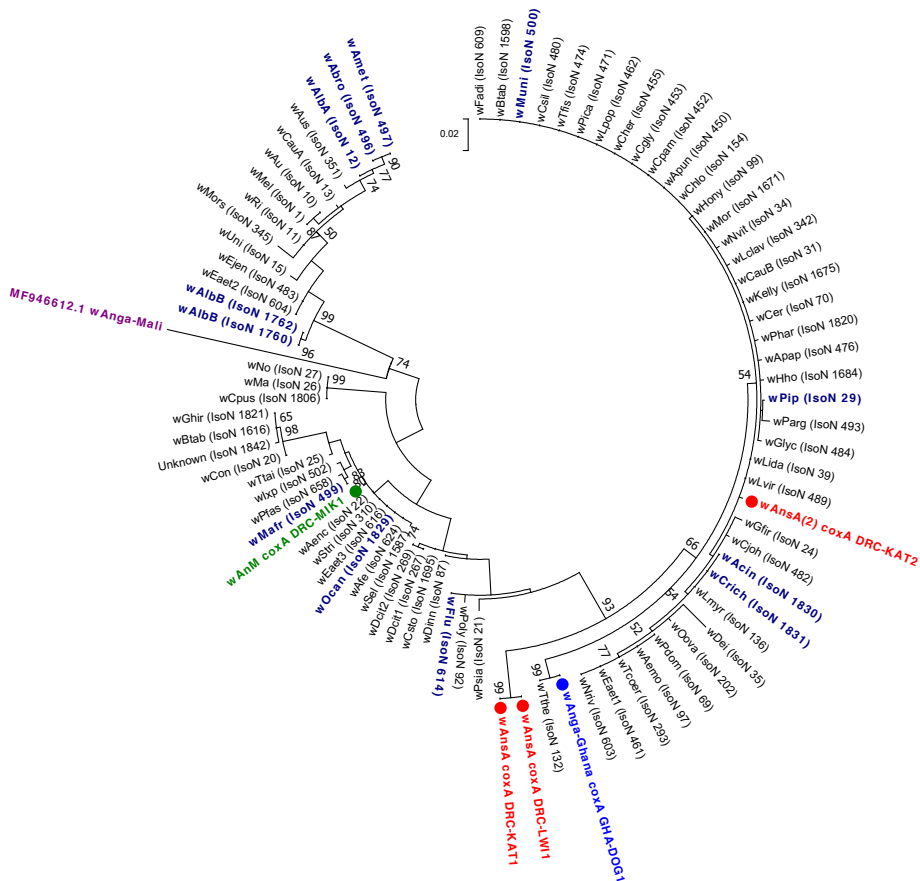

Figure 6

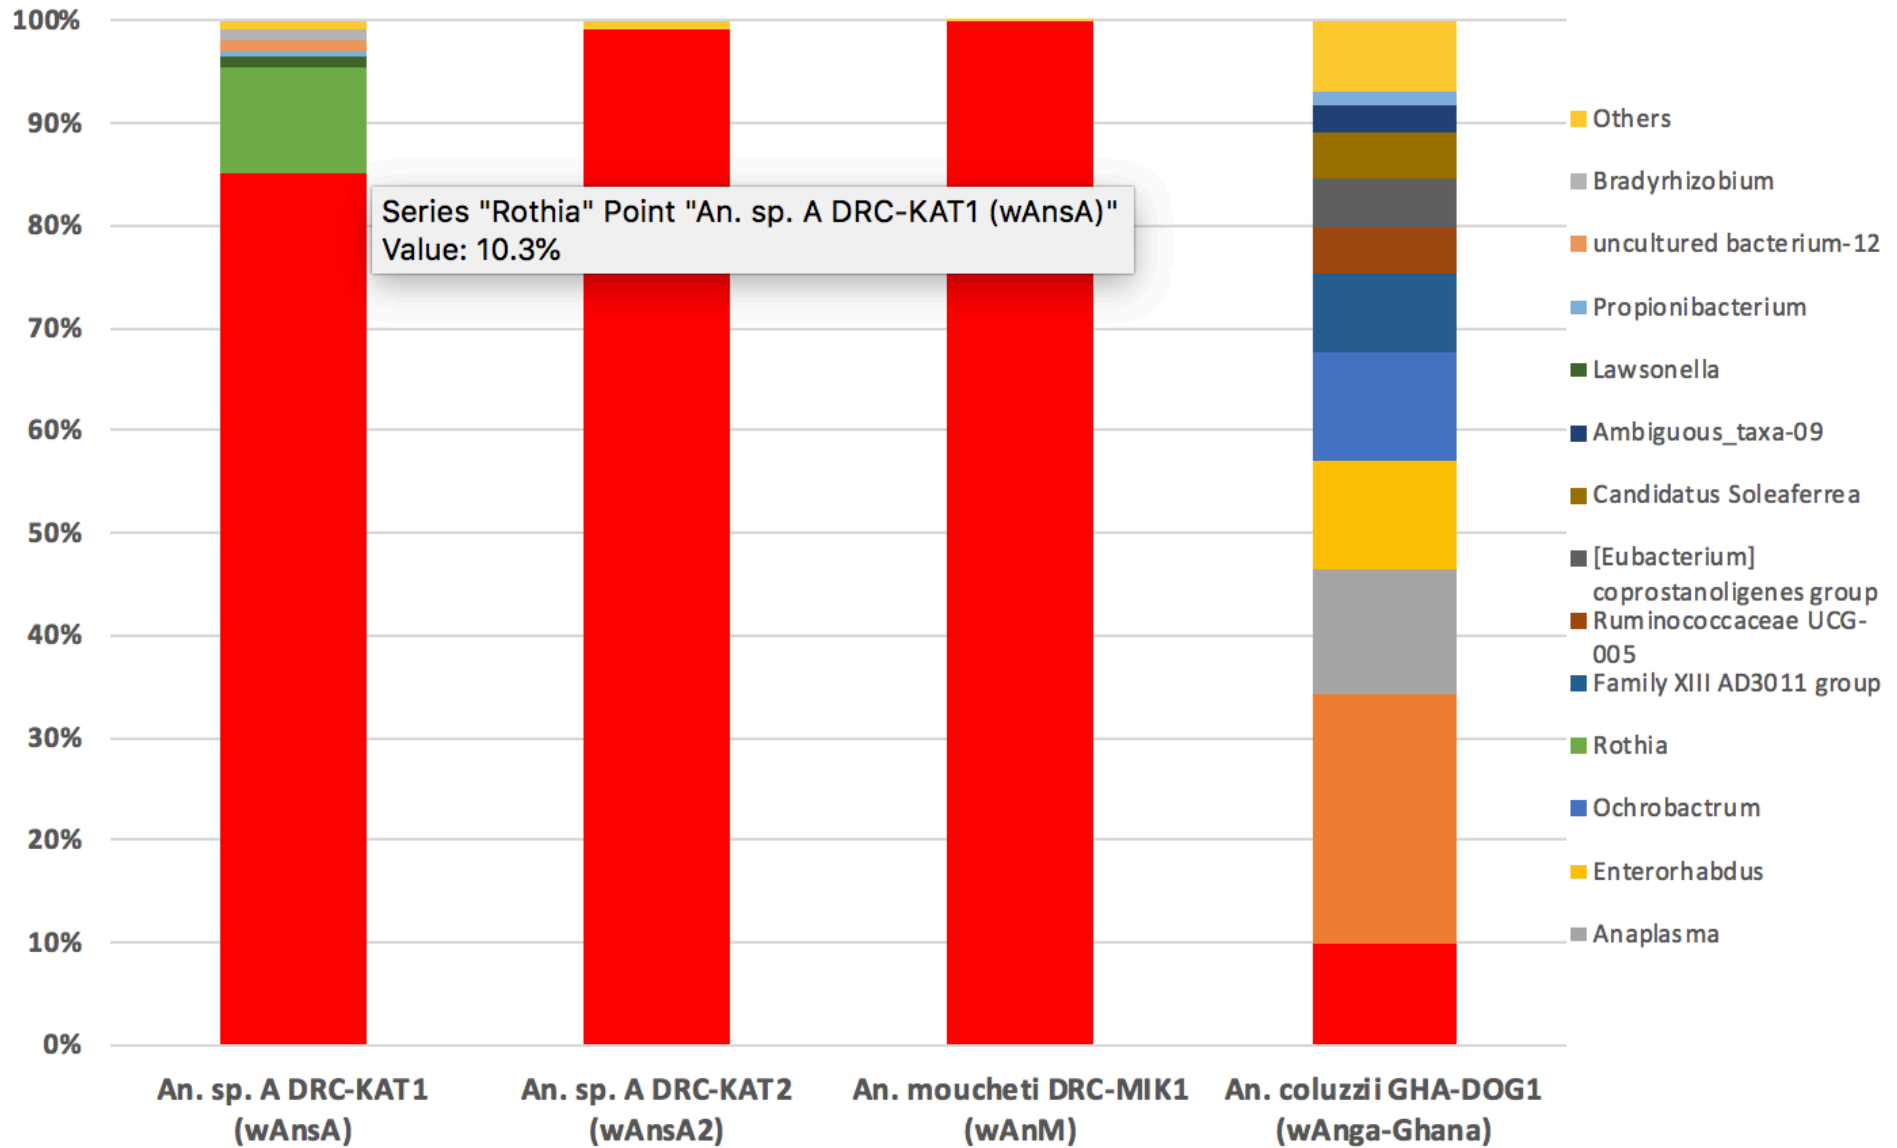

**Figure 7**

**A**

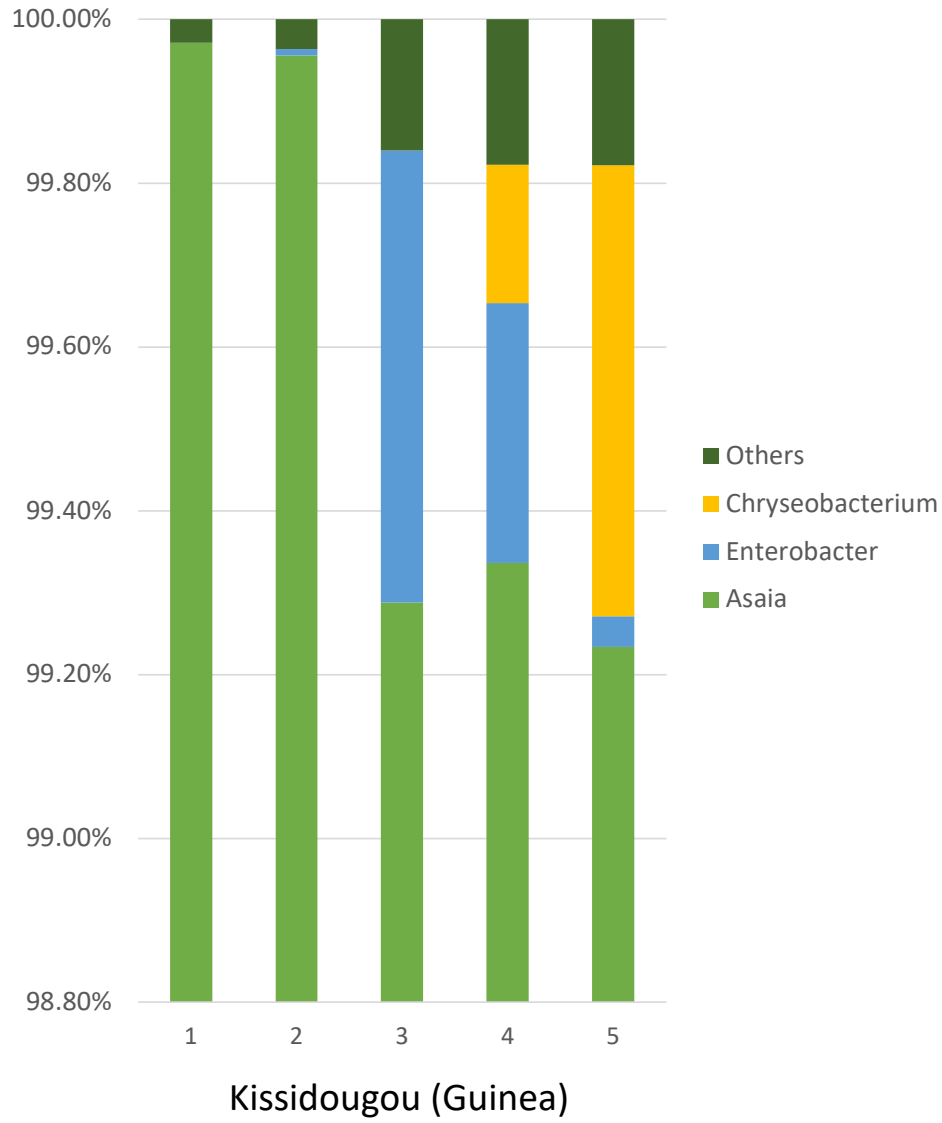

**B**

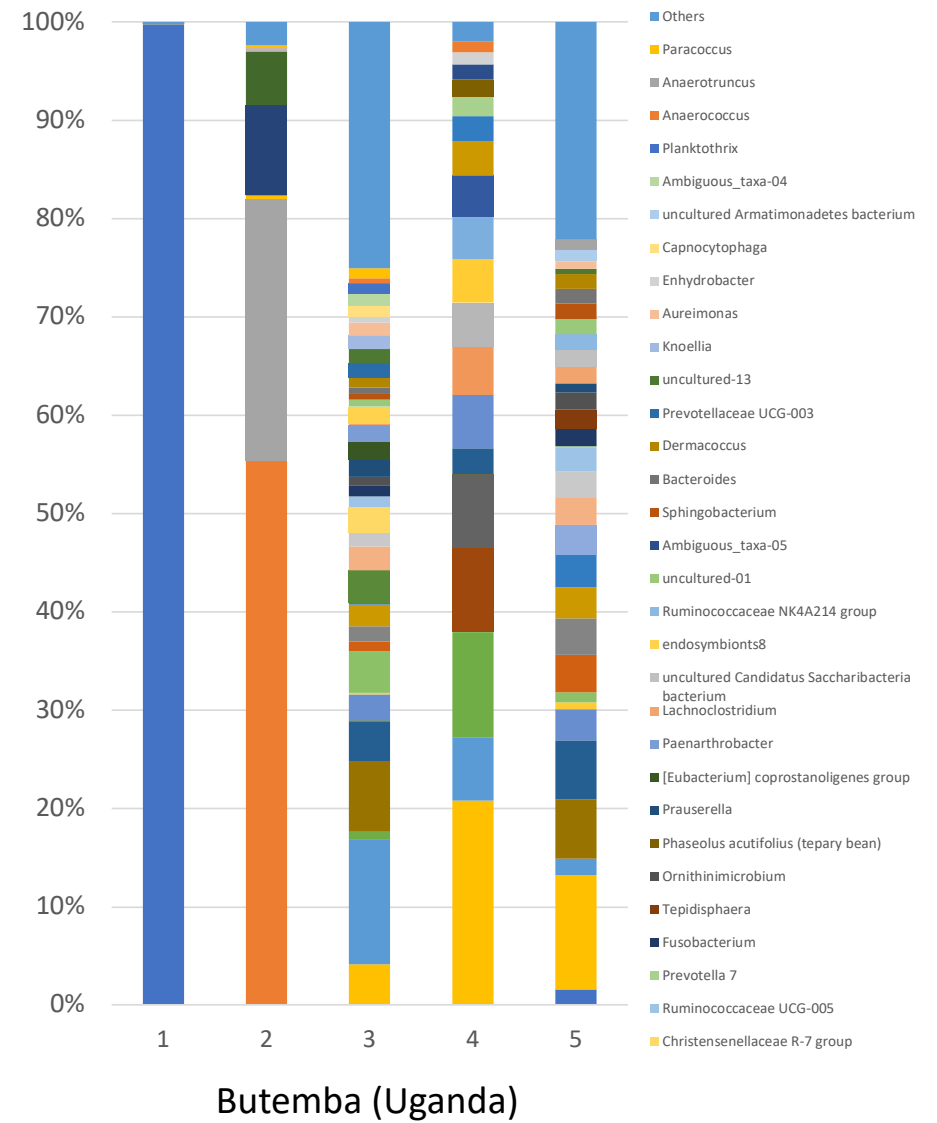

Supplementary Figure S1

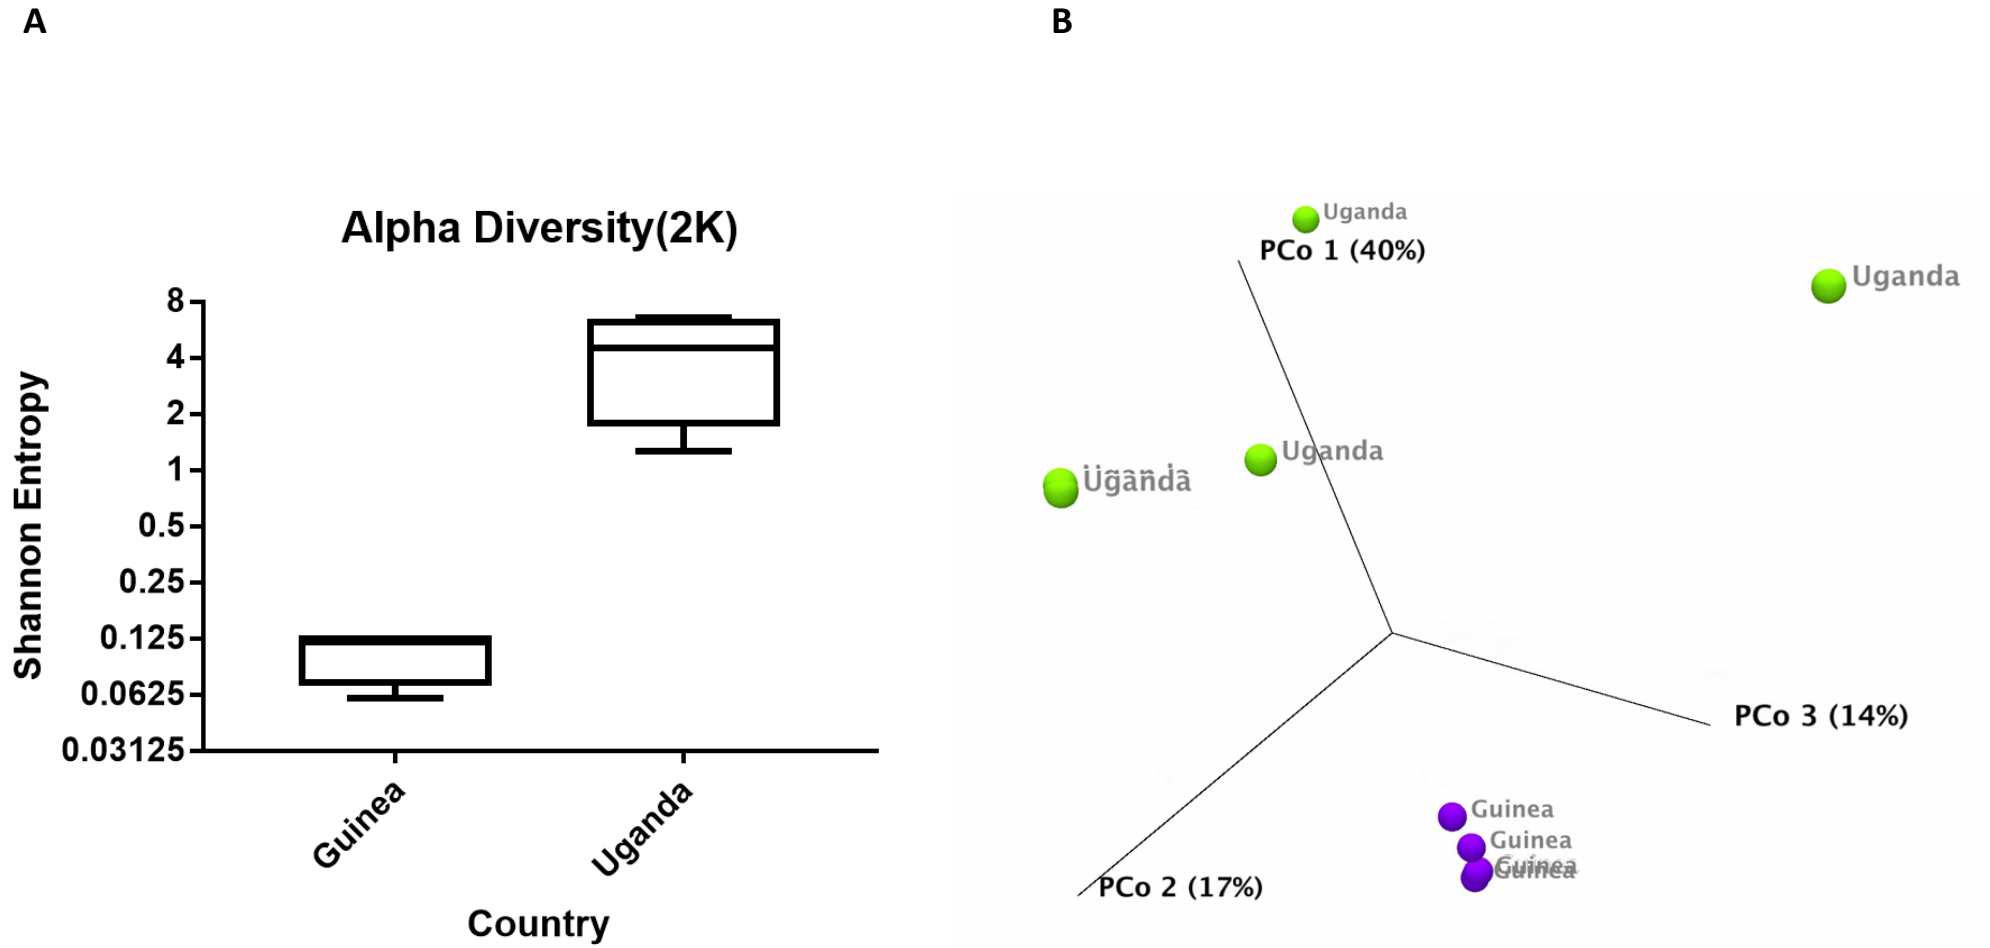

Supplementary Figure S2

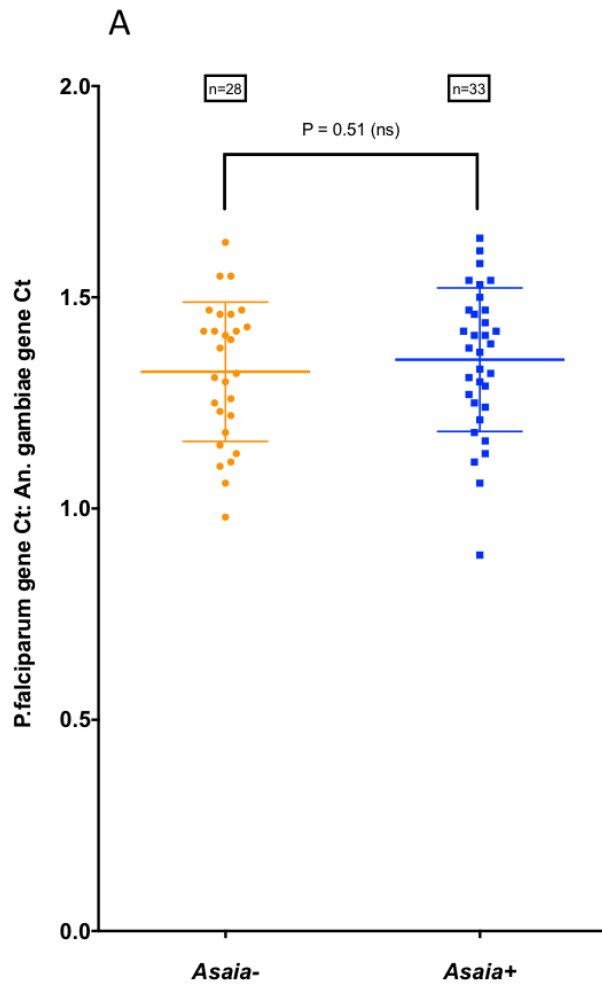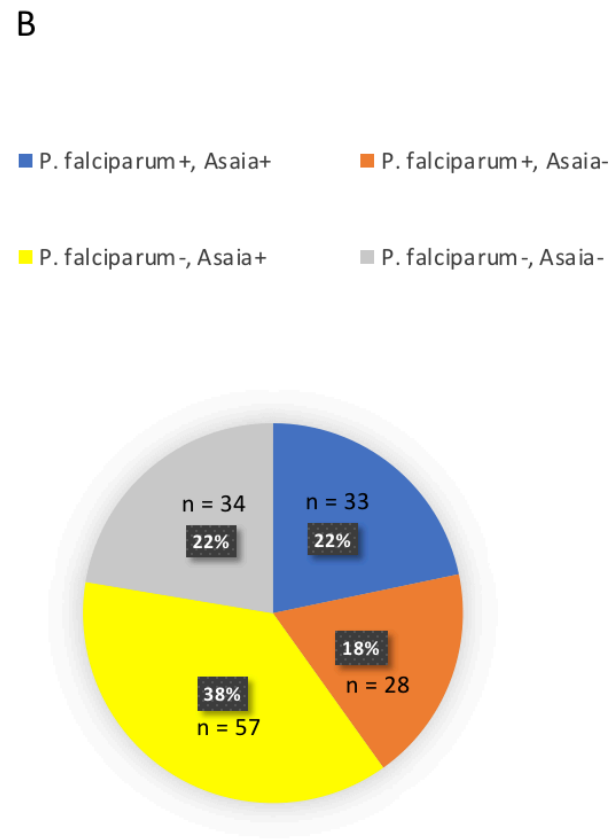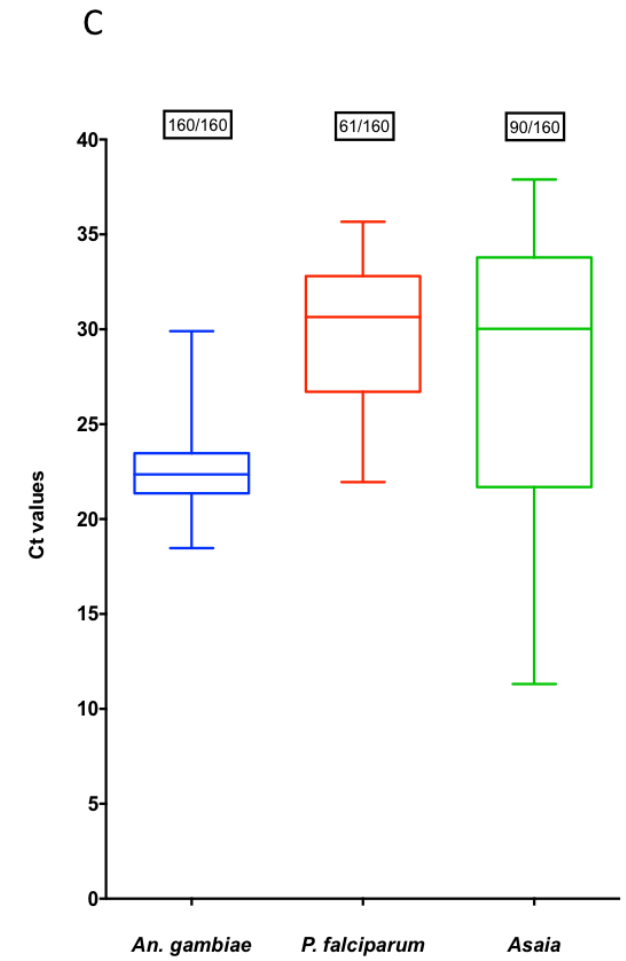

Source: http://biorxiv.org/content/10.1101/338434v2.full.pdf
